# Supplementary material for: Synthesis and crystal structures of nickel(ii) and palladium(ii) complexes with o-carboranyl amidine ligands
Source: Royal Society of Chemistry journal article supplement (doi:10.1039/d1dt00373a), 2021-01-01
Supplement: d1dt00373a1.pdf [file d1dt00373a1.pdf]

**Synthesis and Crystal Structures of Nickel(II) and Palladium(II) Complexes  
with *o*-Carboranyl Amidine Ligands**

**Marina Yu. Stogniy,<sup>a</sup> Svetlana A. Erokhina,<sup>a</sup> Kirill.Yu. Suponitskiy,<sup>a,b</sup> Vitaliy Yu.  
Markov,<sup>c</sup> Igor B. Sivaev<sup>a</sup>**

<sup>a</sup> *A.N. Nesmeyanov Institute of Organoelement Compounds, Russian Academy of Sciences,  
28 Vavilov Str., 119991, Moscow, Russia*

<sup>b</sup> *G.V. Plekhanov Russian University of Economics, 36 Stremyanniy Line, 117997, Moscow,  
Russia*

<sup>c</sup> *Chemistry Department, M.V. Lomonosov Moscow State University, Leninskie Gory, 1–3,  
119991, Moscow, Russia*

Spectral data for 10-EtC(NHCH<sub>2</sub>CH<sub>2</sub>OMe)=HN-7,8-C<sub>2</sub>B<sub>9</sub>H<sub>11</sub> (**1a**, **1b**).

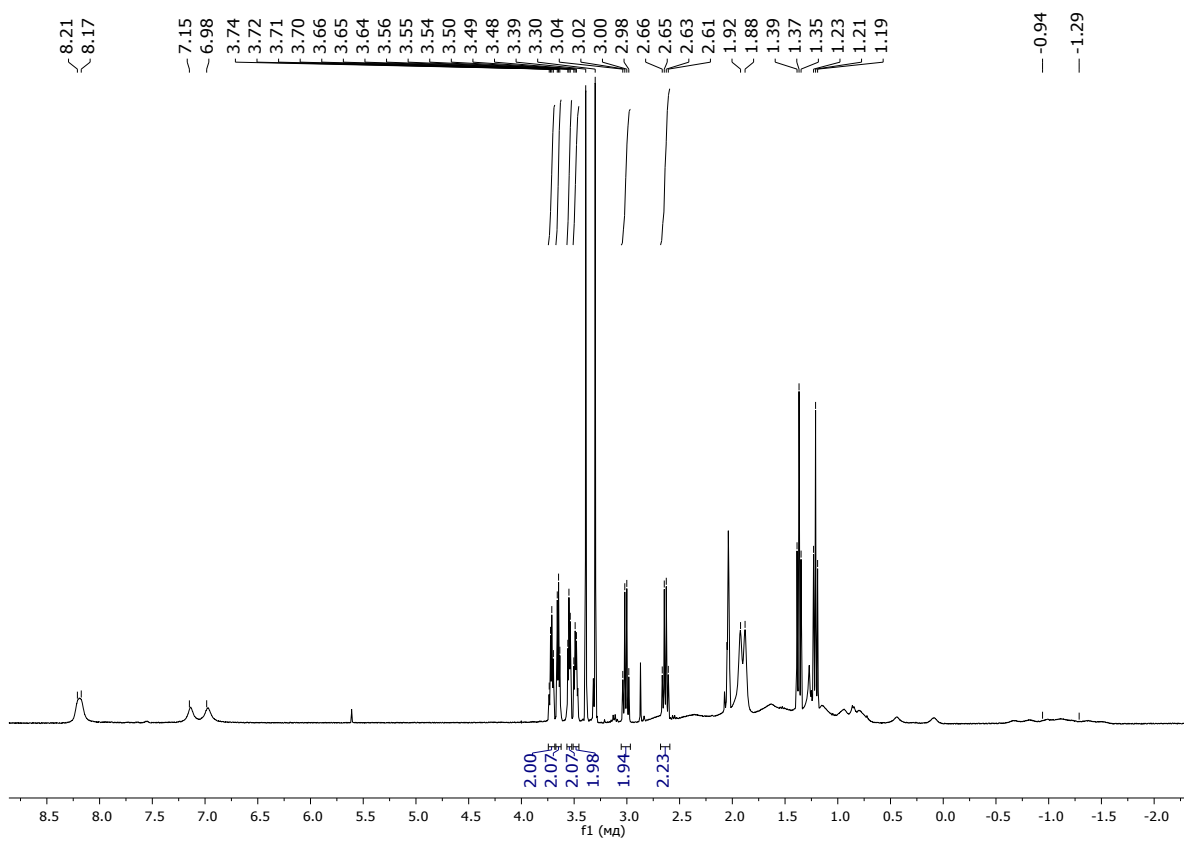

Fig. S1. <sup>1</sup>H NMR spectrum of compounds **1a** and **1b** (acetone-d<sub>6</sub>)

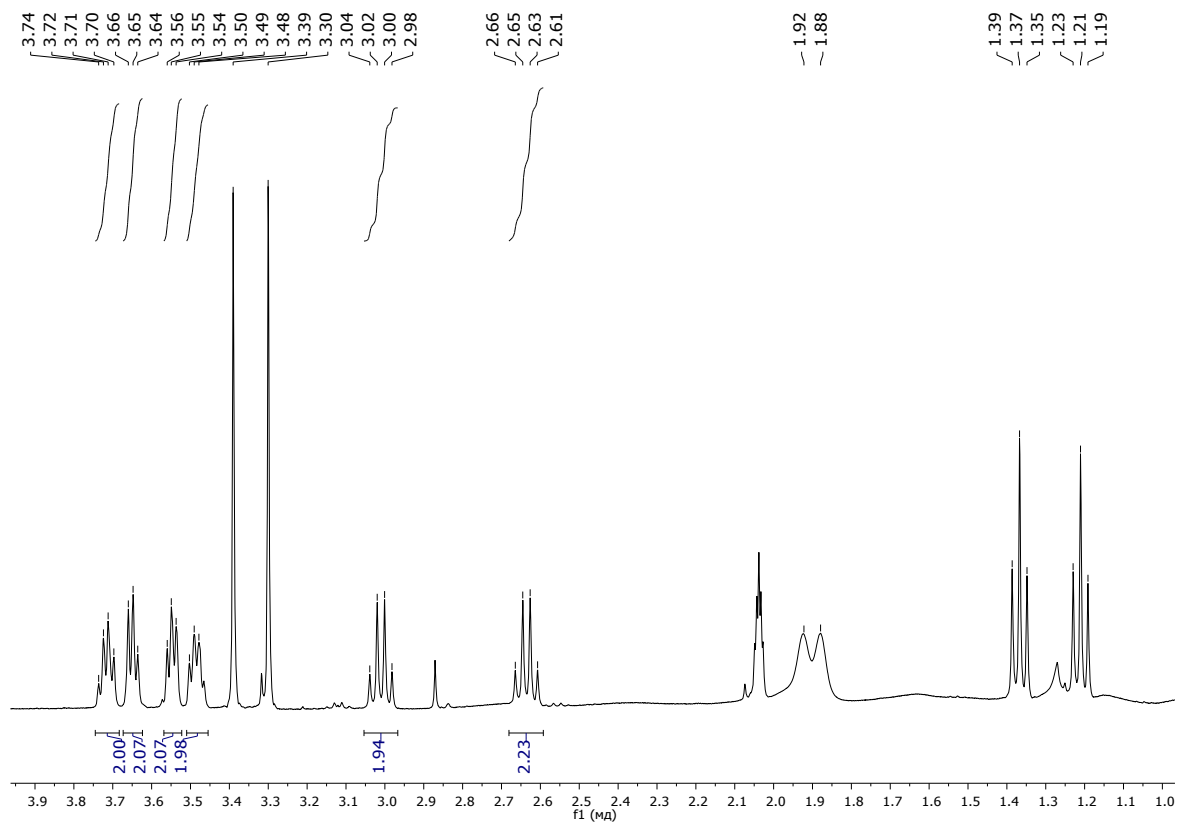

Fig. S2. The fragment of <sup>1</sup>H NMR spectrum of compounds **1a** and **1b** (acetone-d<sub>6</sub>)

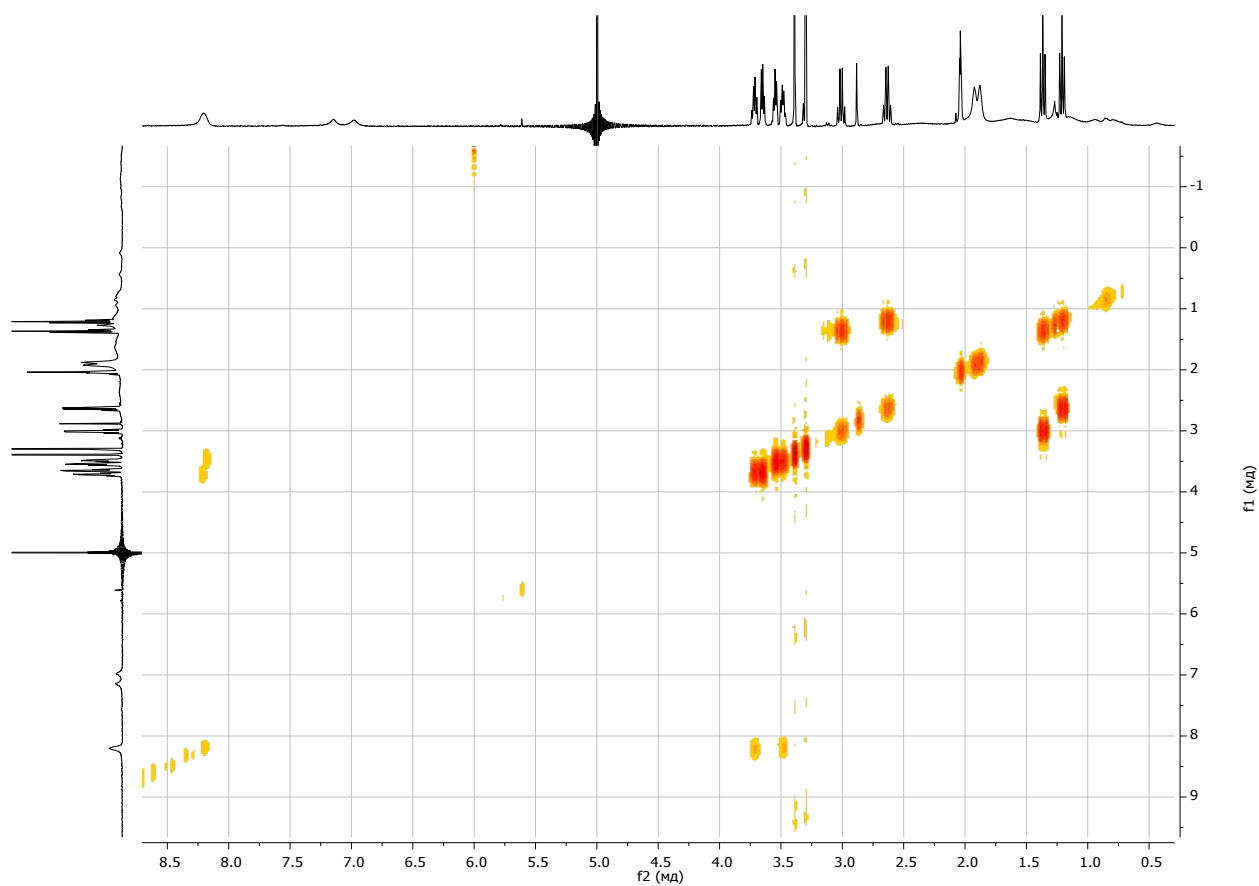

Fig. S3. (HH)gCOSY NMR spectrum of compounds **1a** and **1b** (acetone-d<sub>6</sub>)

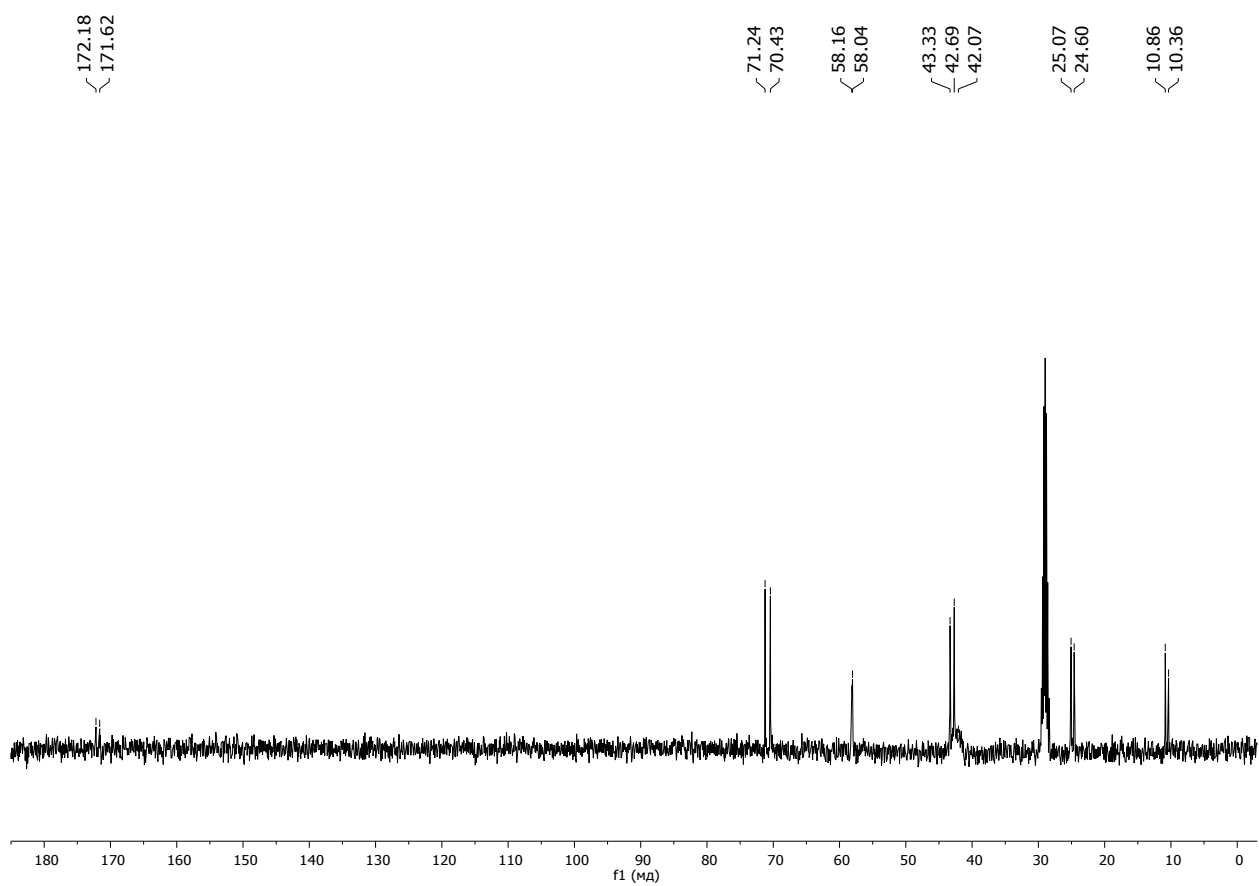

Fig. S4. <sup>13</sup>C NMR spectrum of compounds **1a** and **1b** (acetone-d<sub>6</sub>)

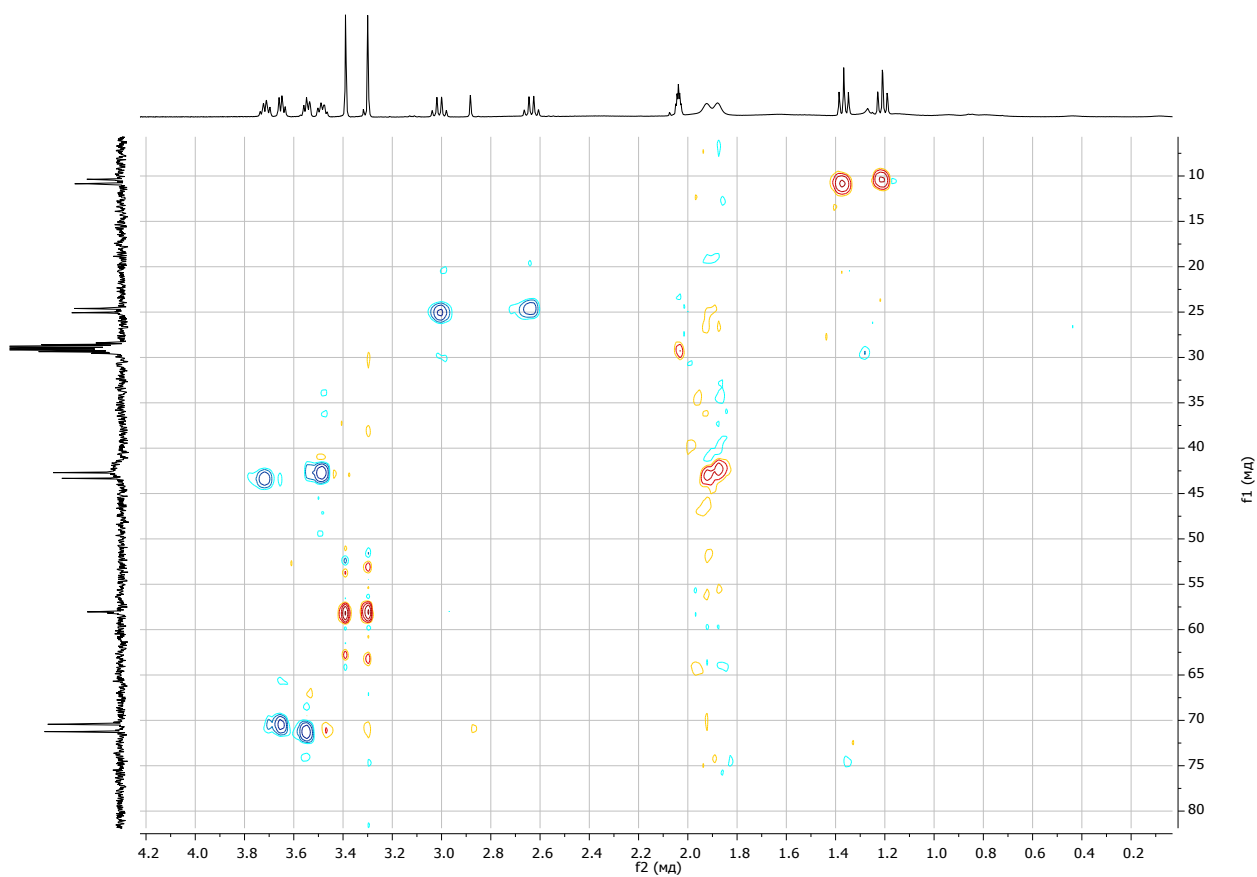

Fig. S5. (HC)HSQC NMR spectrum of compounds **1a** and **1b** (acetone-d<sub>6</sub>)

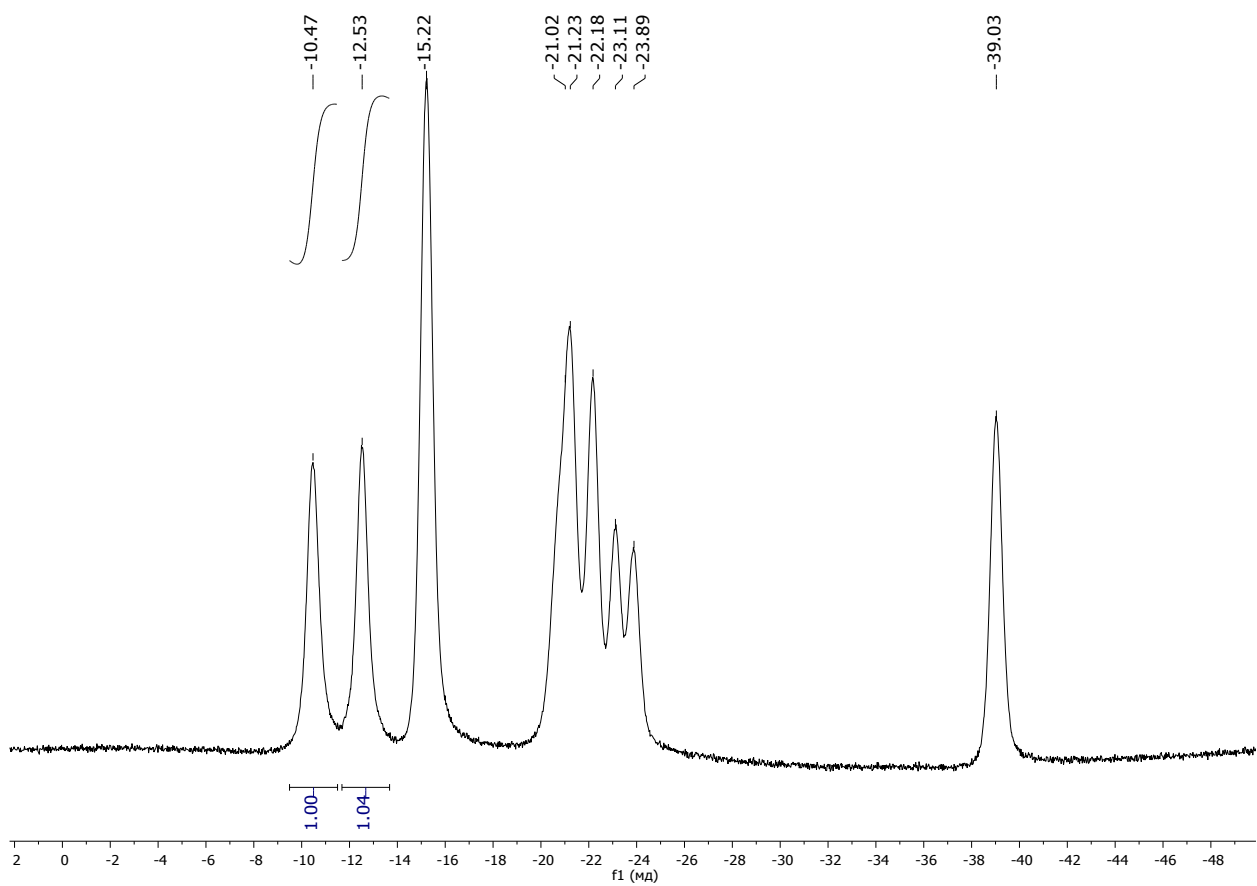

Fig. S6.  $^{11}\text{B}\{^1\text{H}\}$  NMR spectrum of compounds **1a** and **1b** (acetone-d<sub>6</sub>)

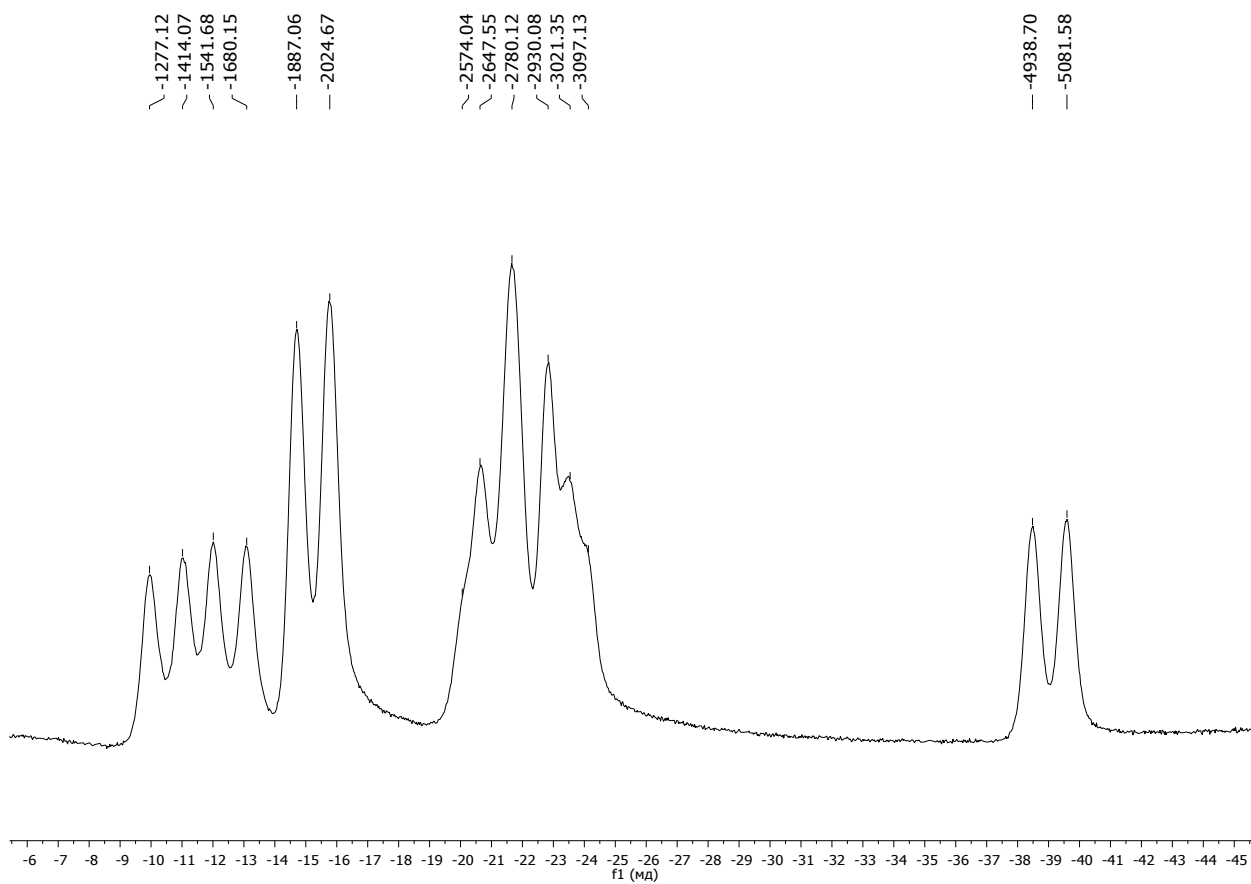

Fig. S7.  $^{11}\text{B}$  NMR spectrum of compounds **1a** and **1b** (acetone- $\text{d}_6$ )

Spectral data for 10-EtC(NHCH<sub>2</sub>CH<sub>2</sub>OH)=HN-7,8-C<sub>2</sub>B<sub>9</sub>H<sub>11</sub> (**2a**, **2b**).

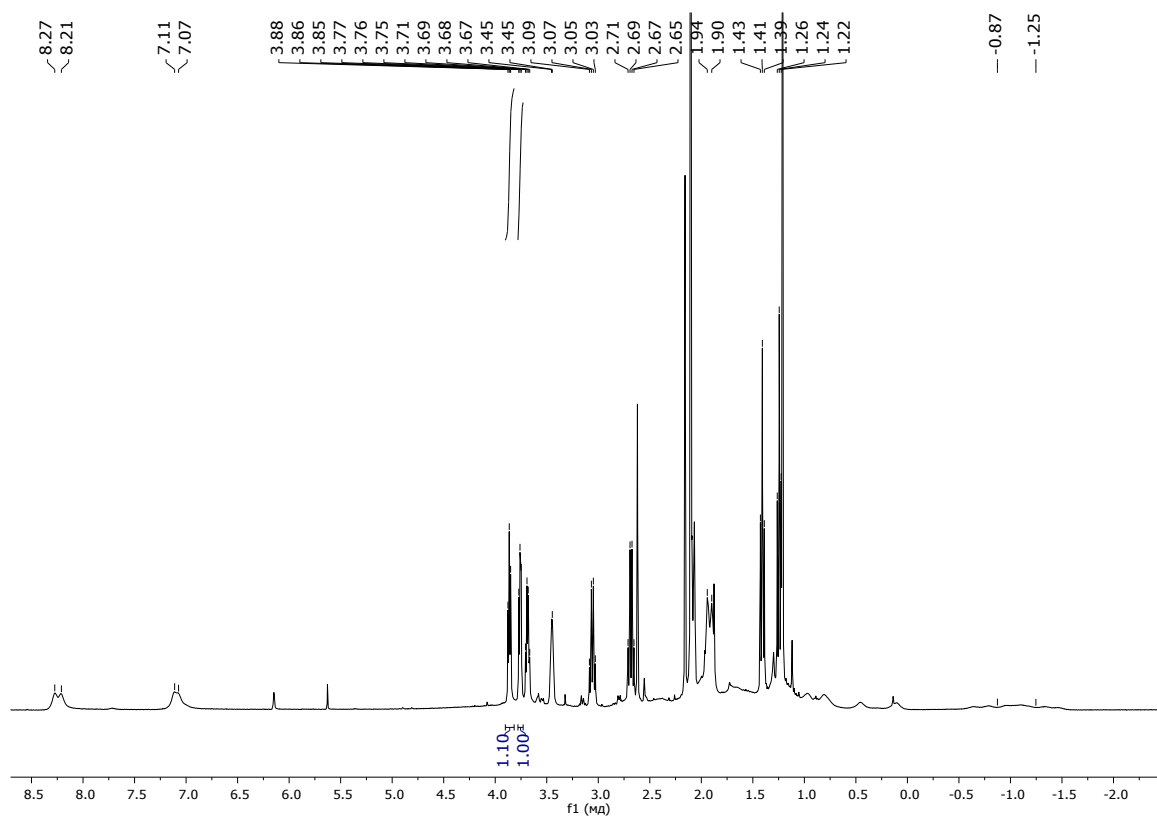

Fig. S8. <sup>1</sup>H NMR spectrum of compounds **2a** and **2b** (acetone-d<sub>6</sub>)

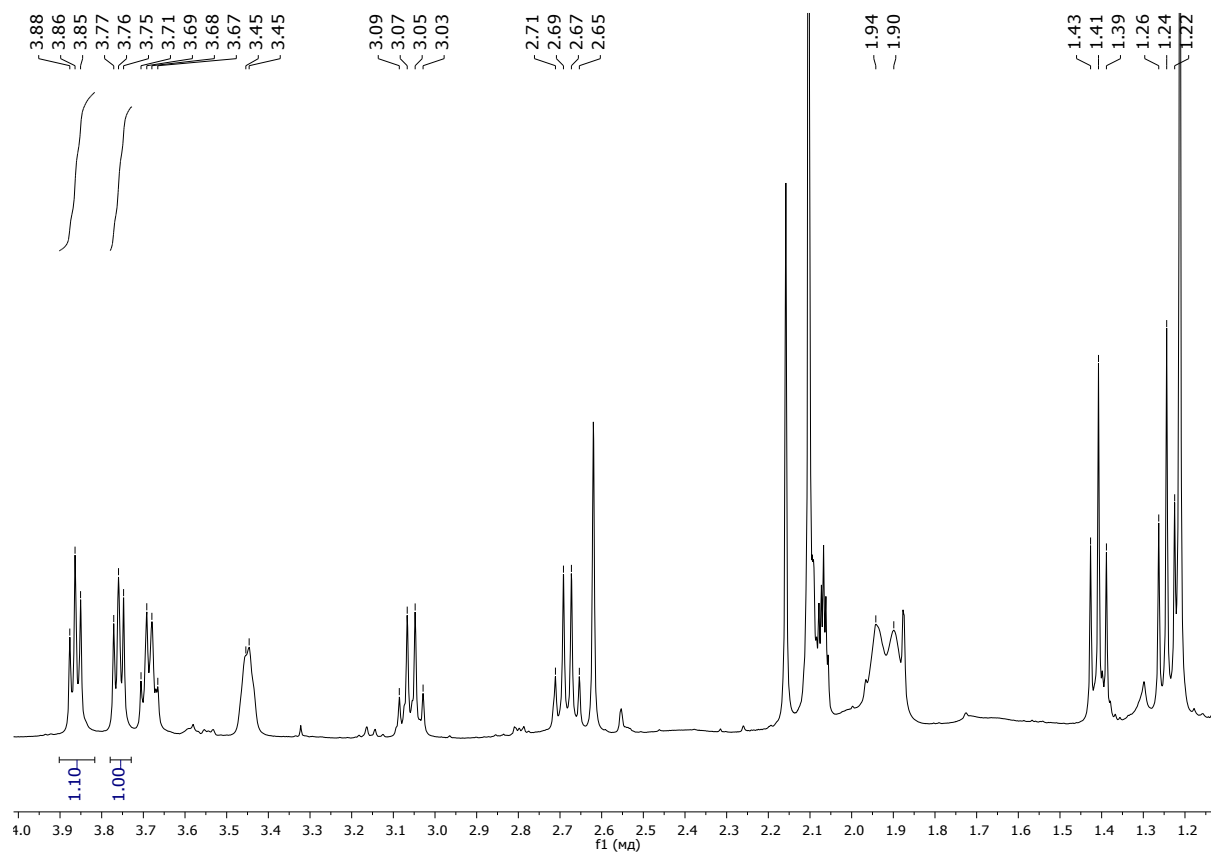

Fig. S9. The fragment of <sup>1</sup>H NMR spectrum of compounds **2a** and **2b** (acetone-d<sub>6</sub>)

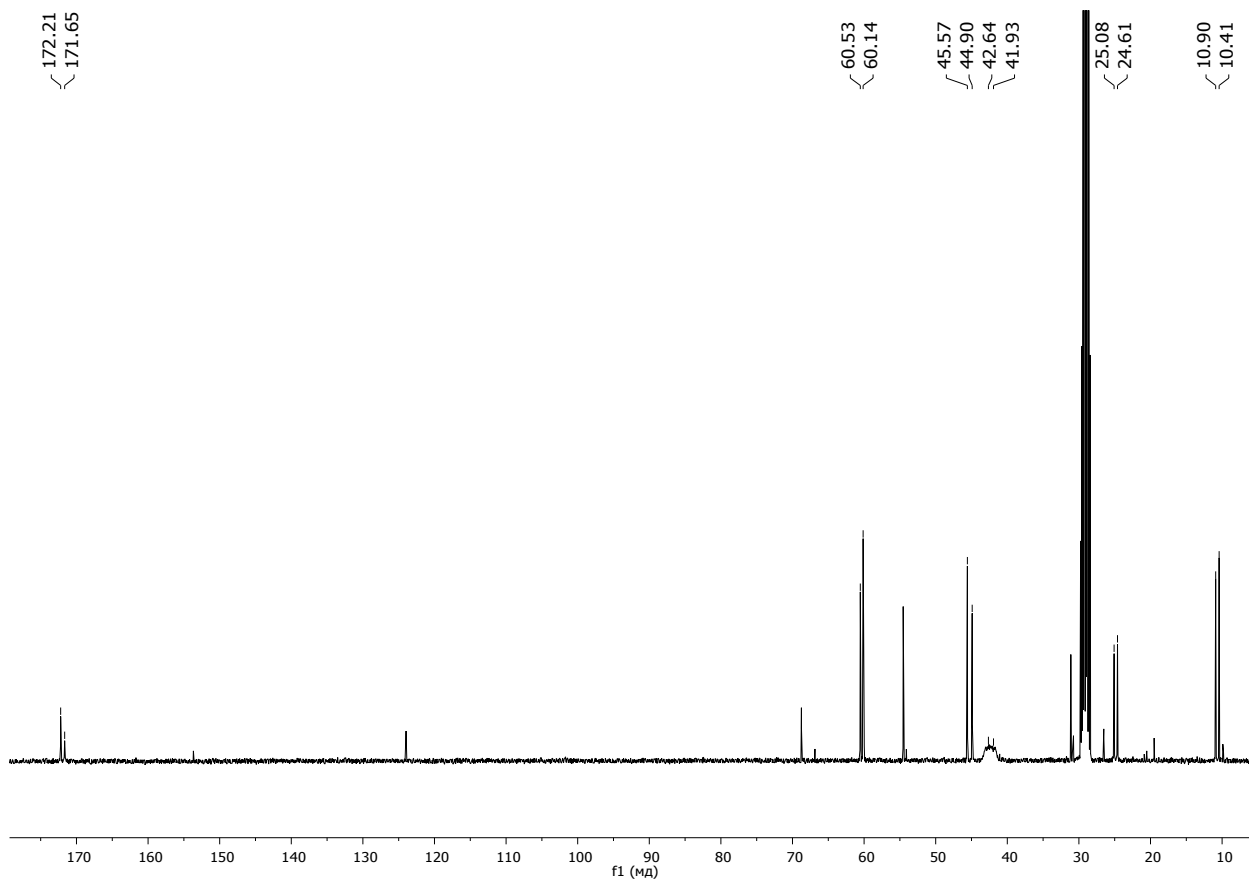

Fig. S10.  $^{13}\text{C}$  NMR spectrum of compounds **2a** and **2b** (acetone- $\text{d}_6$ )

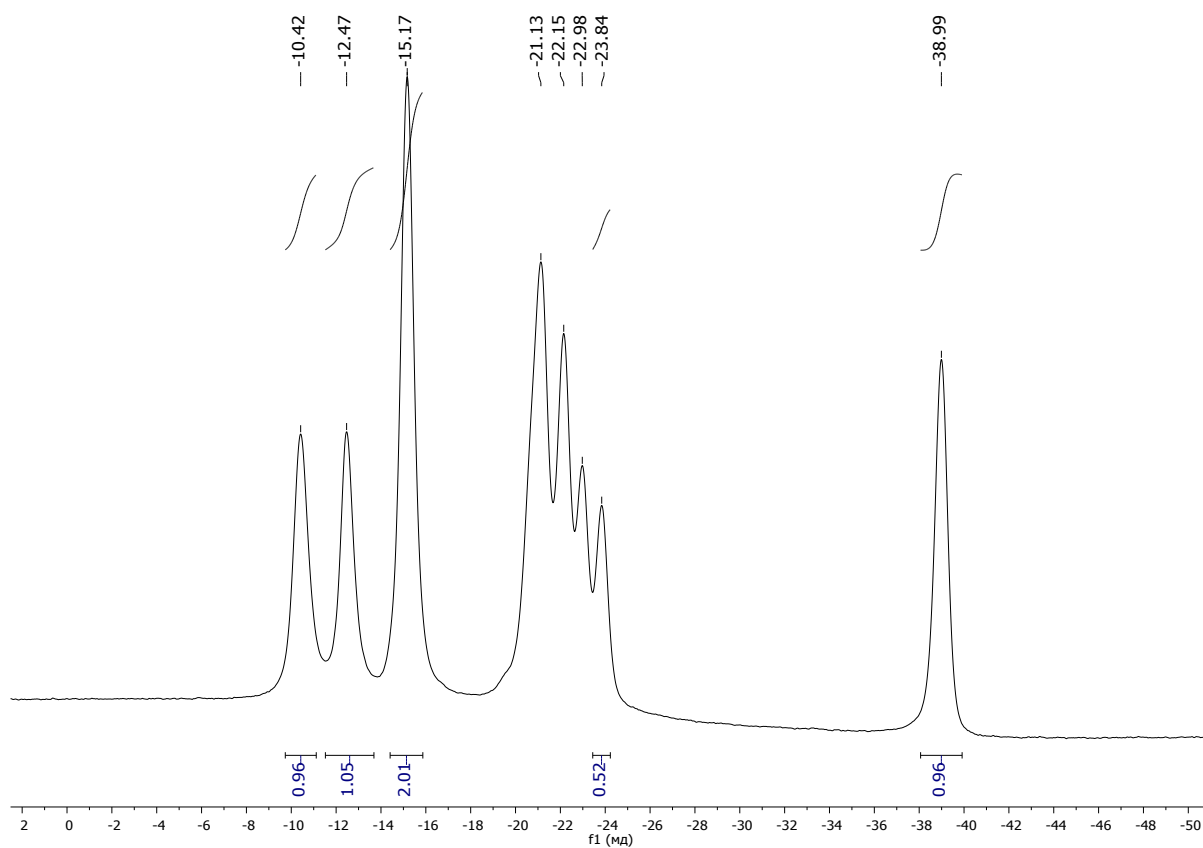

Fig. S11.  $^{11}\text{B}\{^1\text{H}\}$  NMR spectrum of compounds **2a** and **2b** (acetone- $\text{d}_6$ )

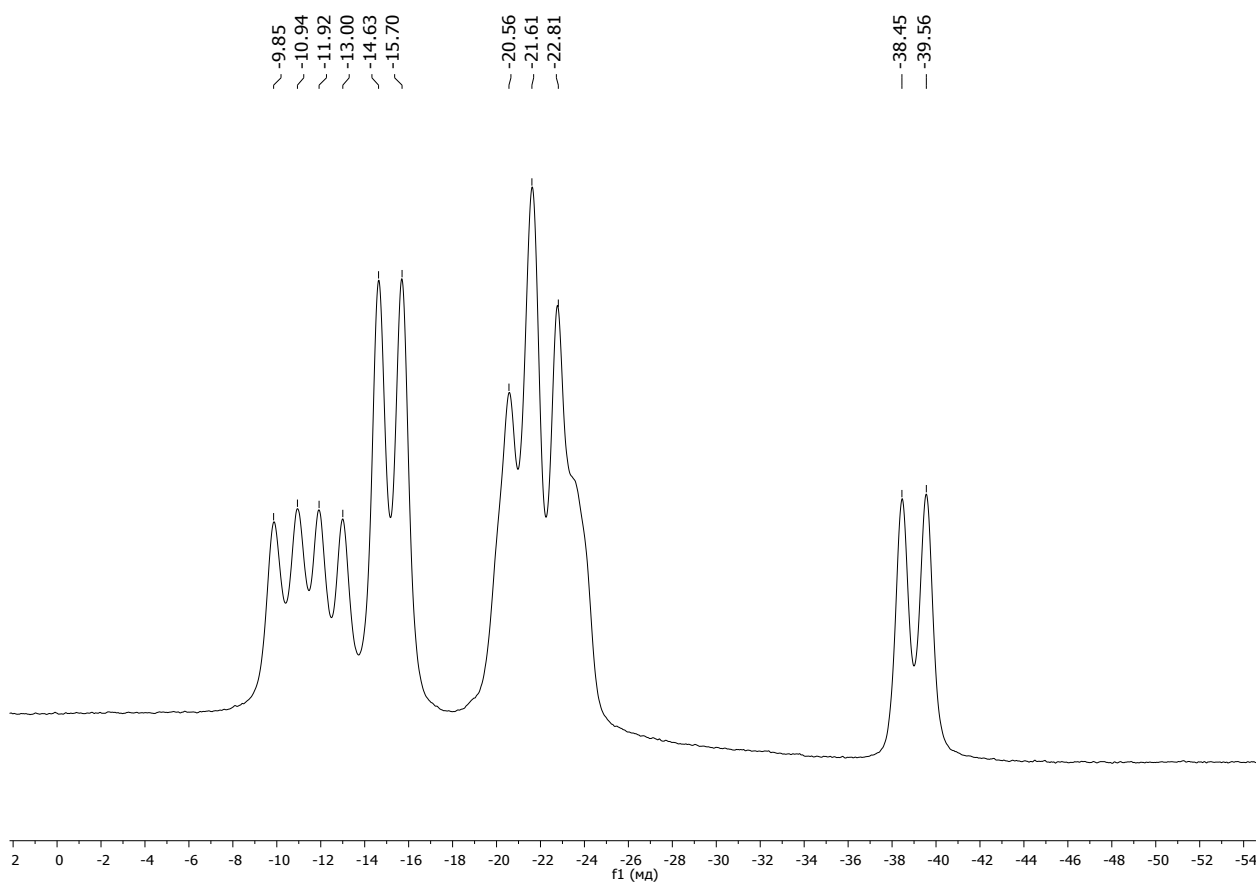

Fig. S12.  $^{11}\text{B}$  NMR spectrum of compounds **2a** and **2b** (acetone- $\text{d}_6$ )



Spectral data for 10-EtC(NHCH<sub>2</sub>CH<sub>2</sub>CH<sub>2</sub>OH)=HN-7,8-C<sub>2</sub>B<sub>9</sub>H<sub>11</sub> (**3a**, **3b**).

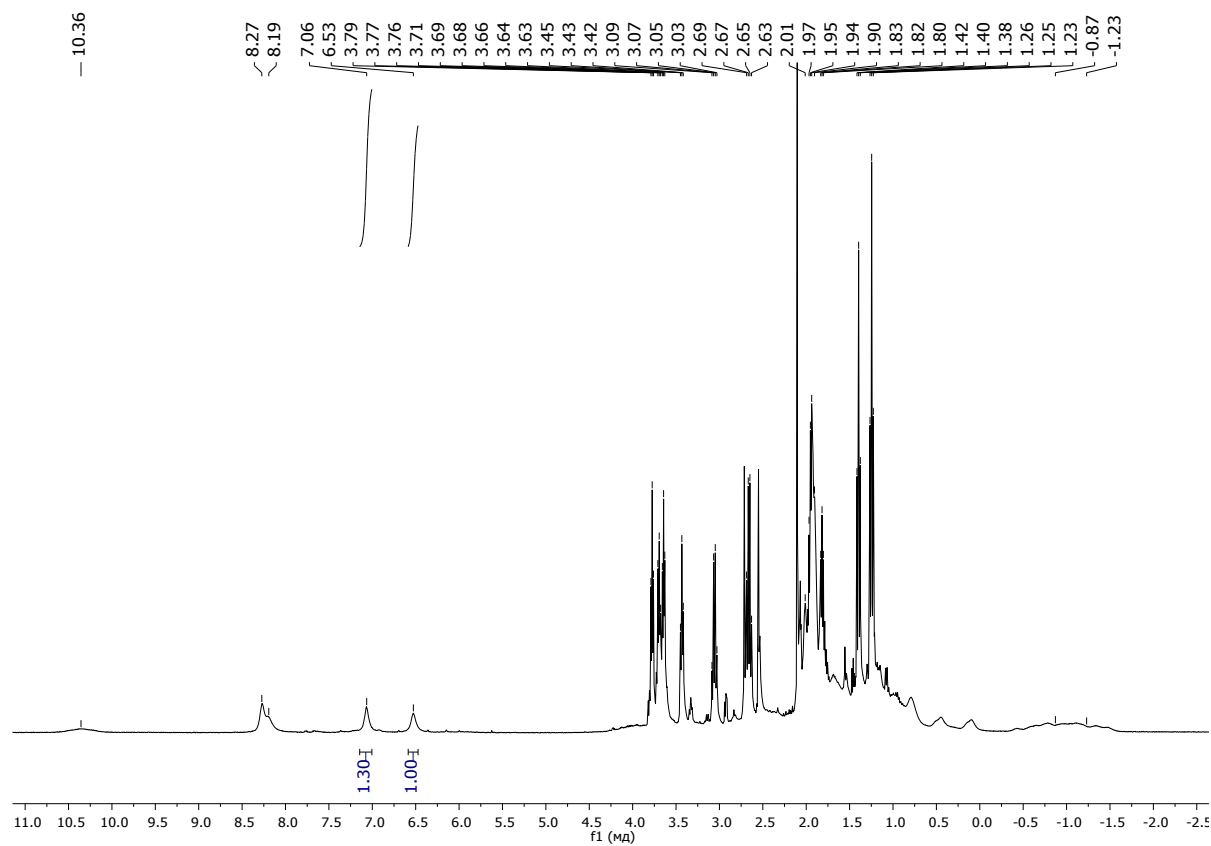

Fig. S13. <sup>1</sup>H NMR spectrum of compounds **3a** and **3b** (acetone-d<sub>6</sub>)

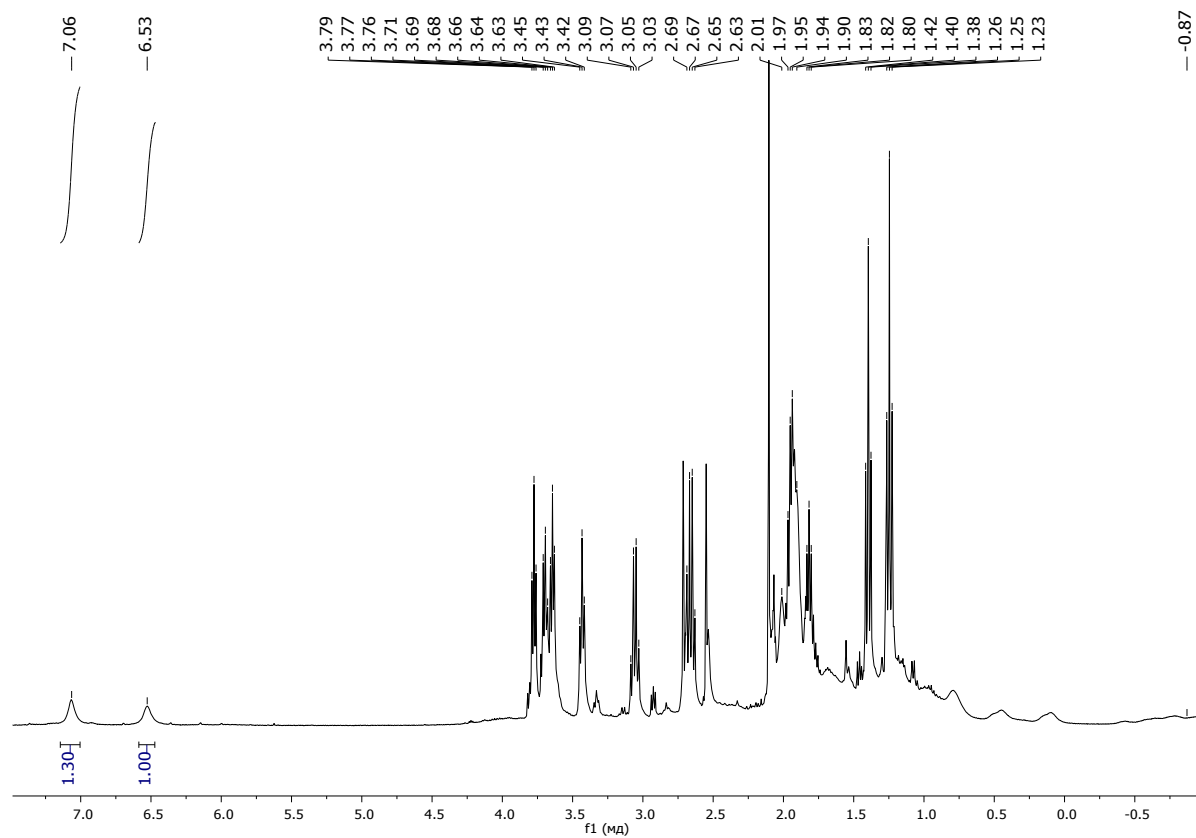

Fig. S14. The fragment of <sup>1</sup>H NMR spectrum of compounds **3a** and **3b** (acetone-d<sub>6</sub>)

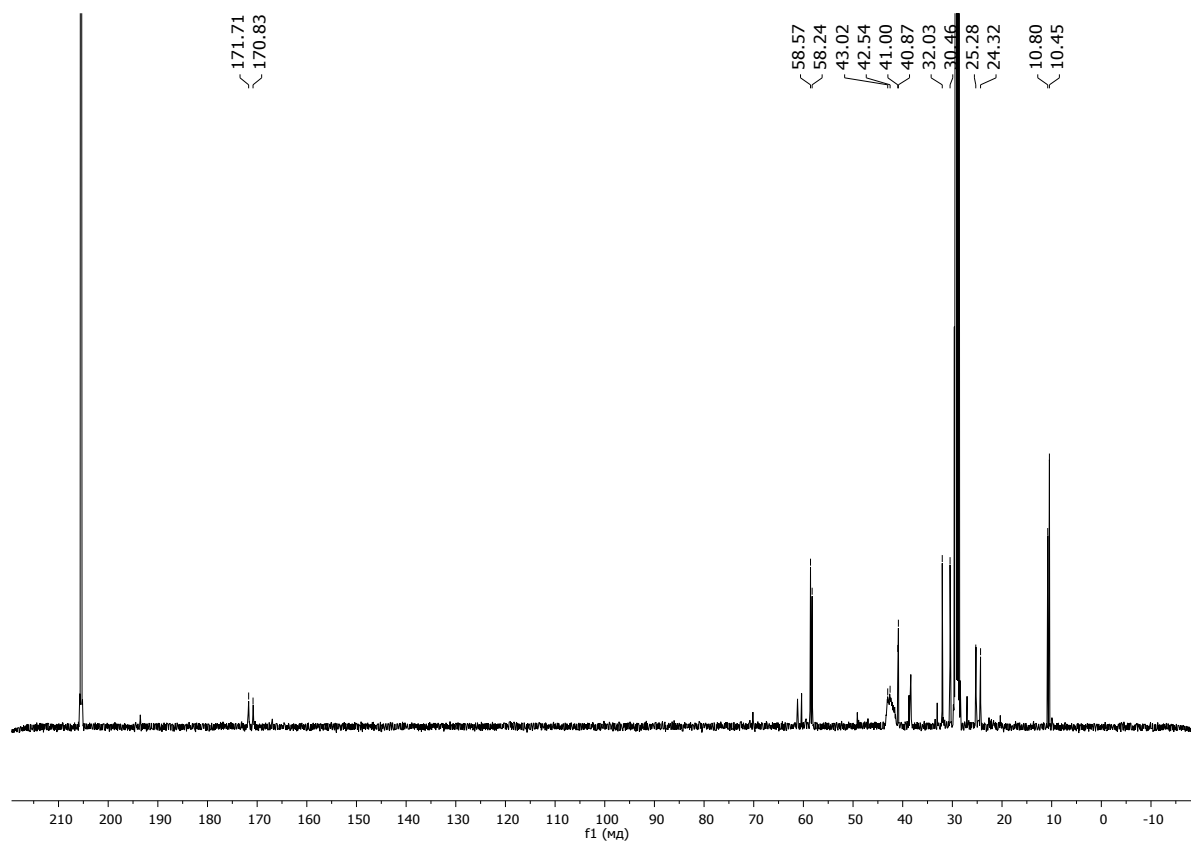

Fig. S15.  $^{13}\text{C}$  NMR spectrum of compounds **3a** and **3b** (acetone- $\text{d}_6$ )

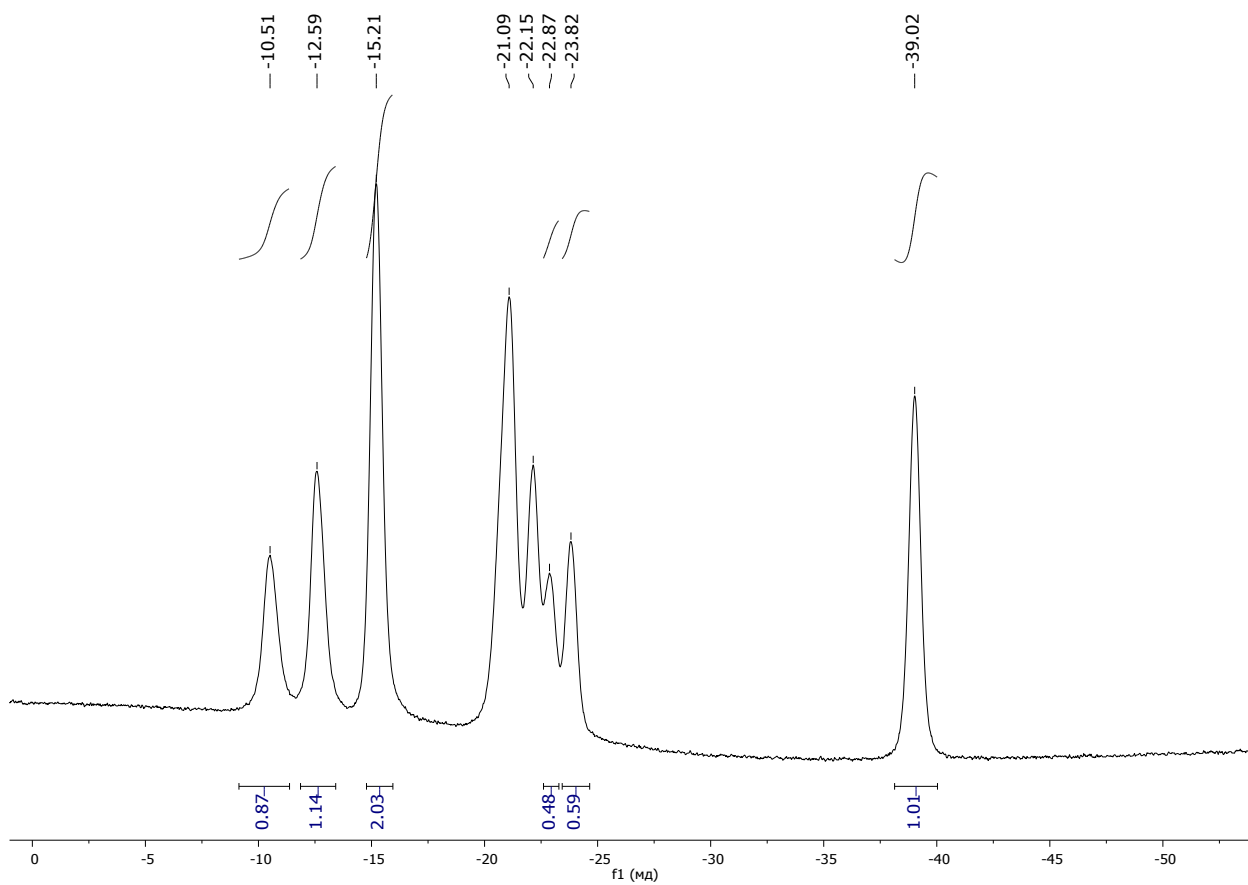

Fig. S16.  $^{11}\text{B}\{^1\text{H}\}$  NMR spectrum of compounds **3a** and **3b** (acetone- $\text{d}_6$ )

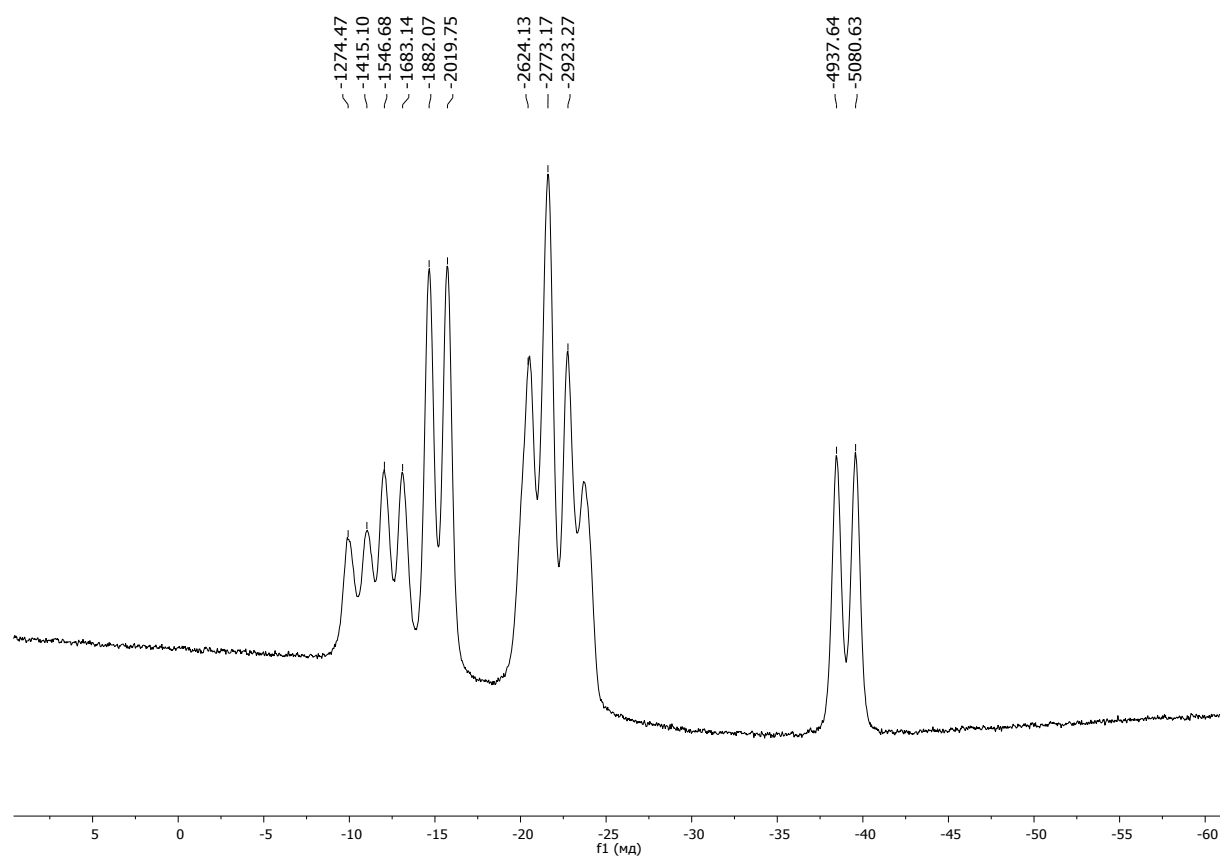

Fig. S17.  $^{11}\text{B}$  NMR spectrum of compounds **3a** and **3b** (acetone- $\text{d}_6$ )

Spectral data for 10-EtC(NHCH<sub>2</sub>CH<sub>2</sub>CH<sub>2</sub>NMe<sub>2</sub>)=HN-7,8-C<sub>2</sub>B<sub>9</sub>H<sub>11</sub> (**4a**, **4b**).

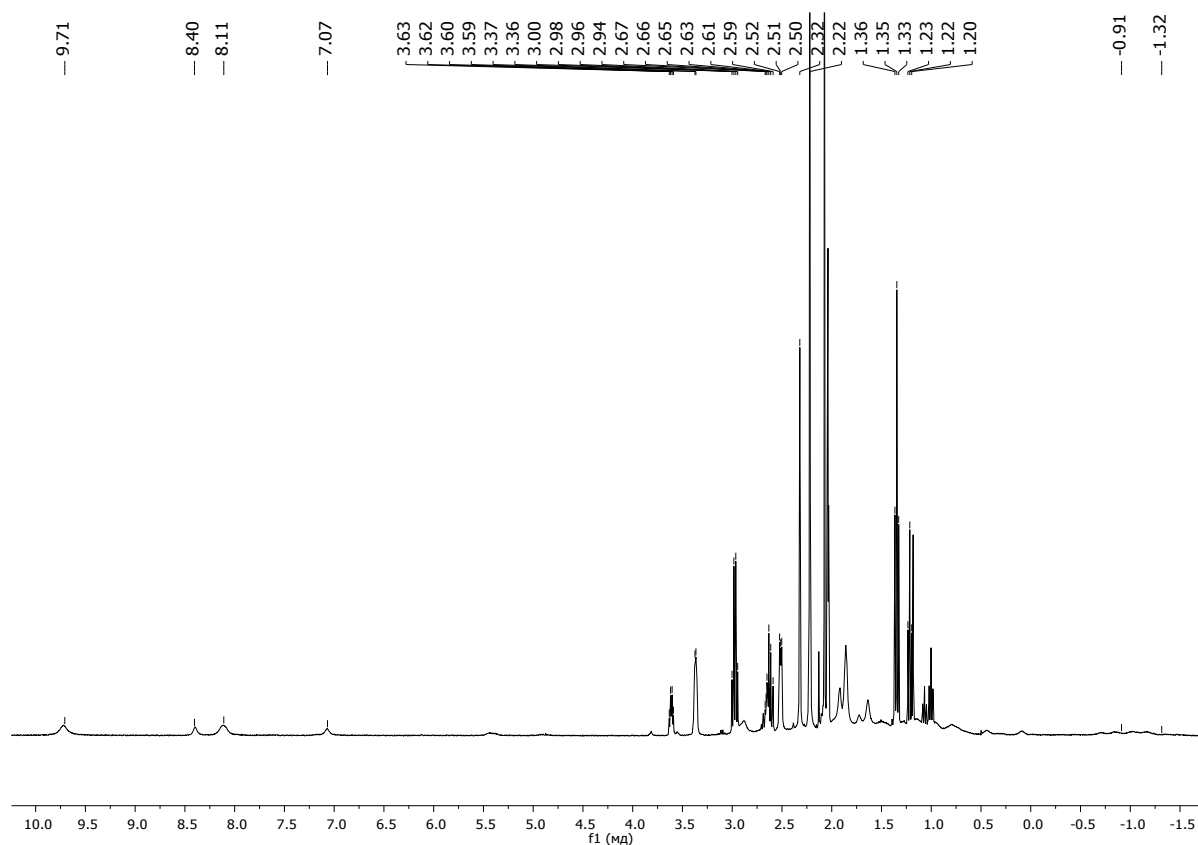

Fig. S18. <sup>1</sup>H NMR spectrum of compounds **4a** and **4b** (acetone-d<sub>6</sub>)

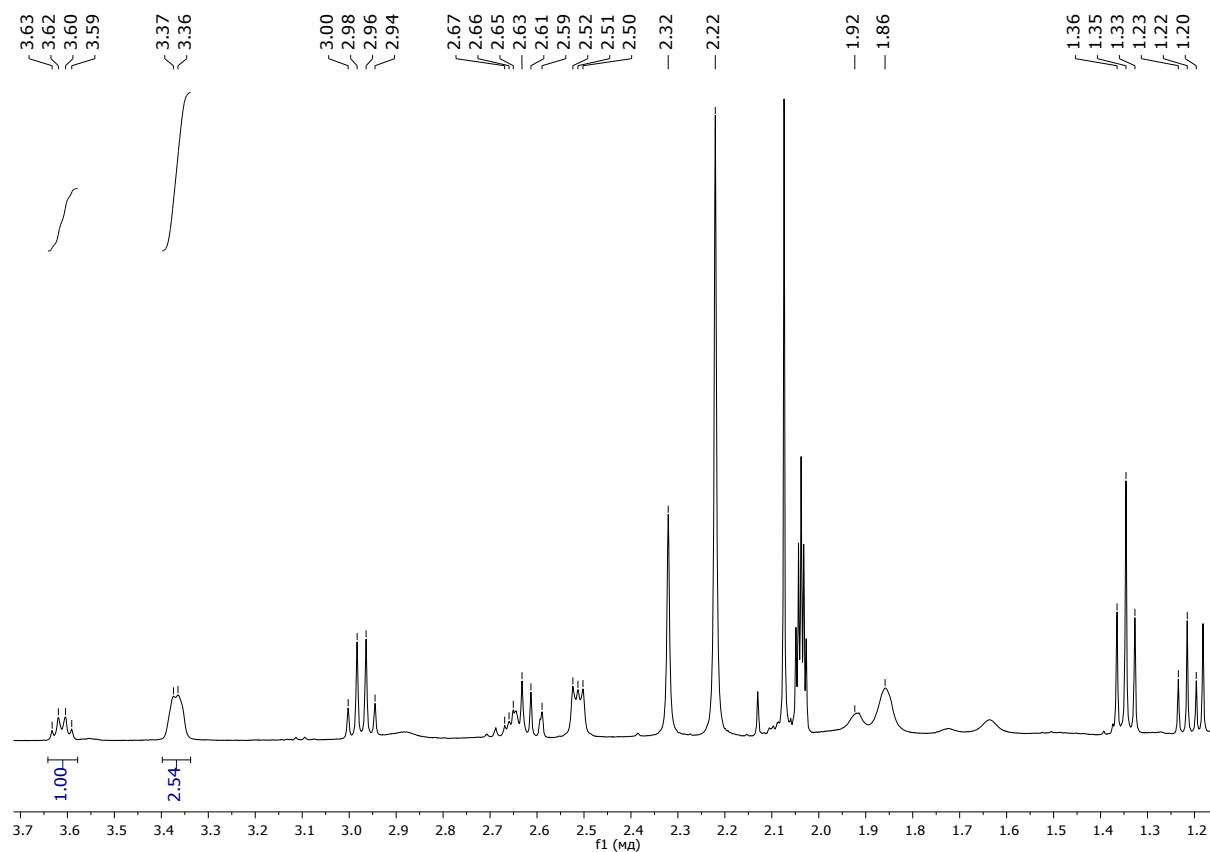

Fig. S19. The fragment of <sup>1</sup>H NMR spectrum of compounds **4a** and **4b** (acetone-d<sub>6</sub>)

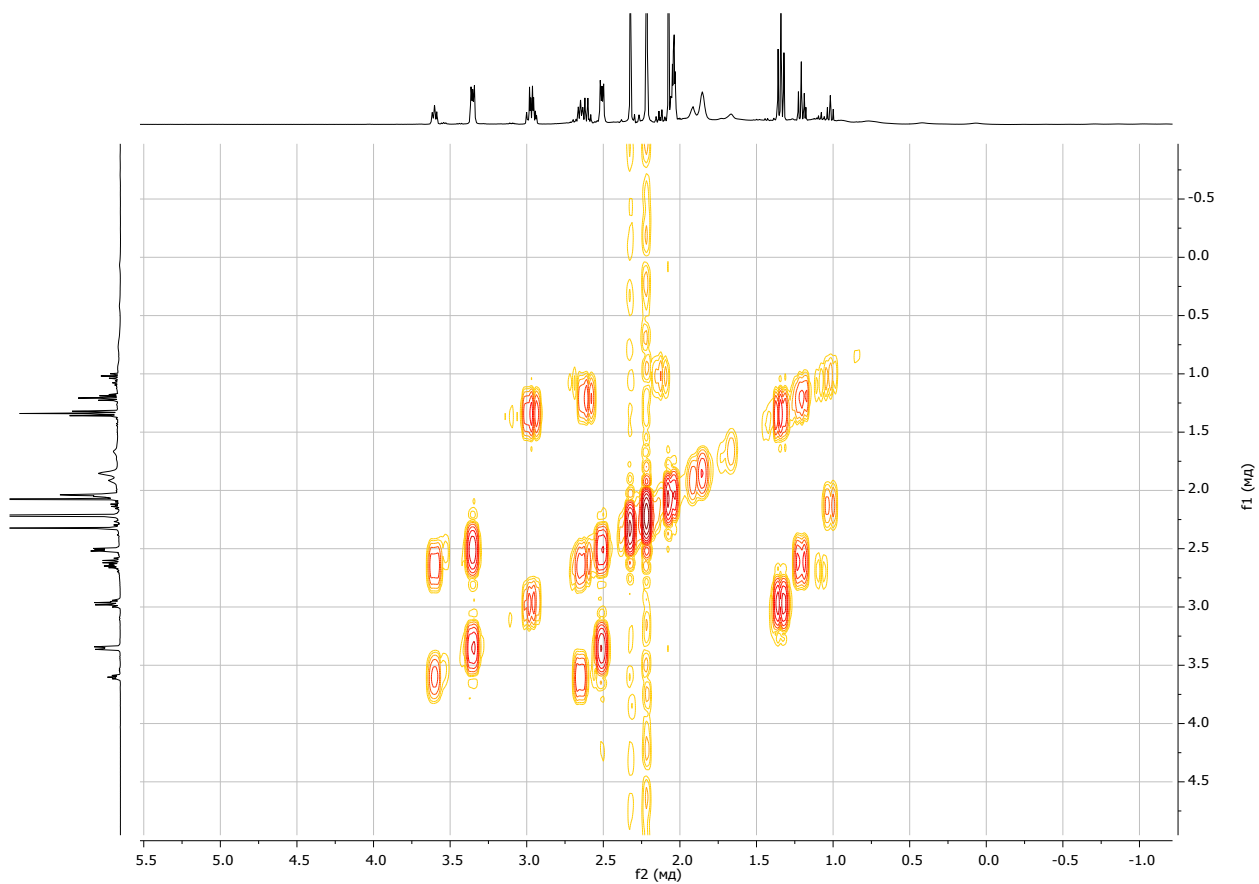

Fig. S20. (HH)gCOSY NMR spectrum of compounds **4a** and **4b** (acetone-d<sub>6</sub>)

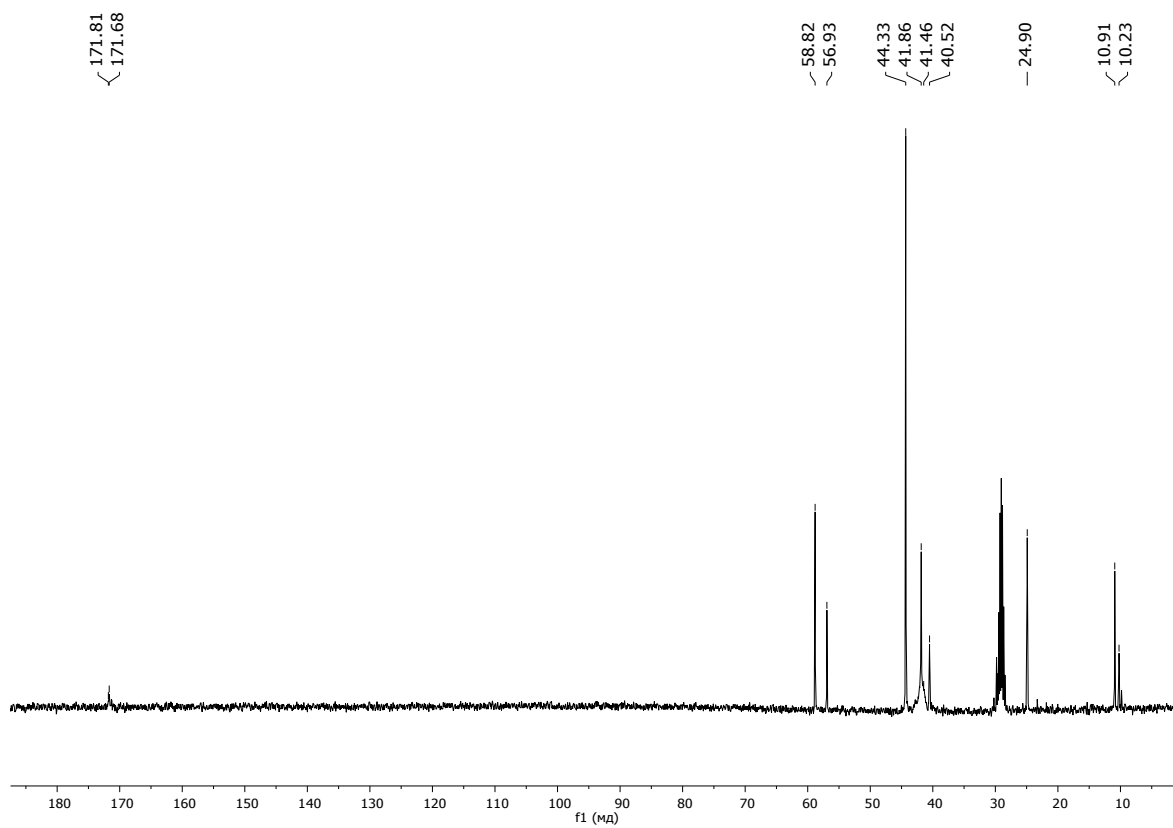

Fig. S21. <sup>13</sup>C NMR spectrum of compounds **4a** and **4b** (acetone-d<sub>6</sub>)

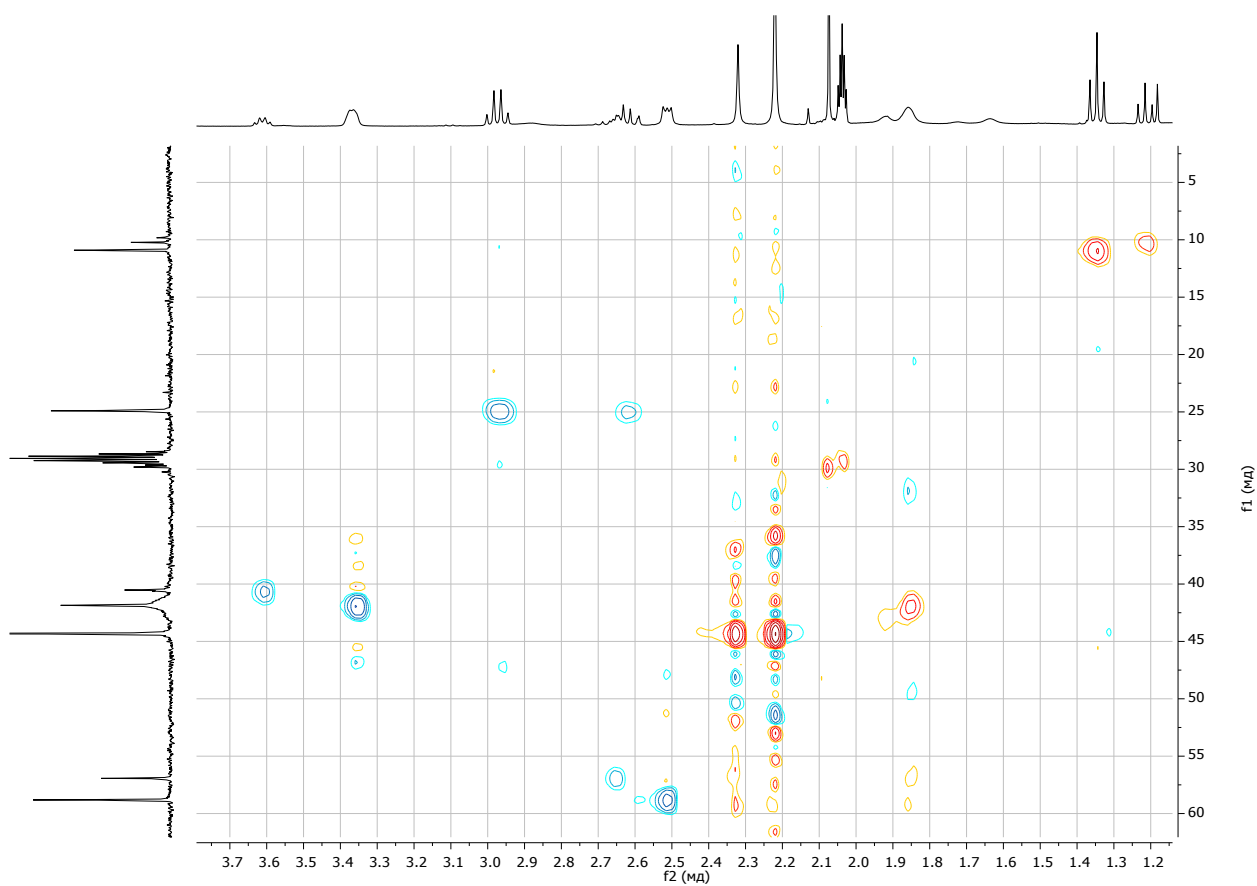

Fig. S22. (HC)HSQC NMR spectrum of compounds **4a** and **4b** (acetone-d<sub>6</sub>)

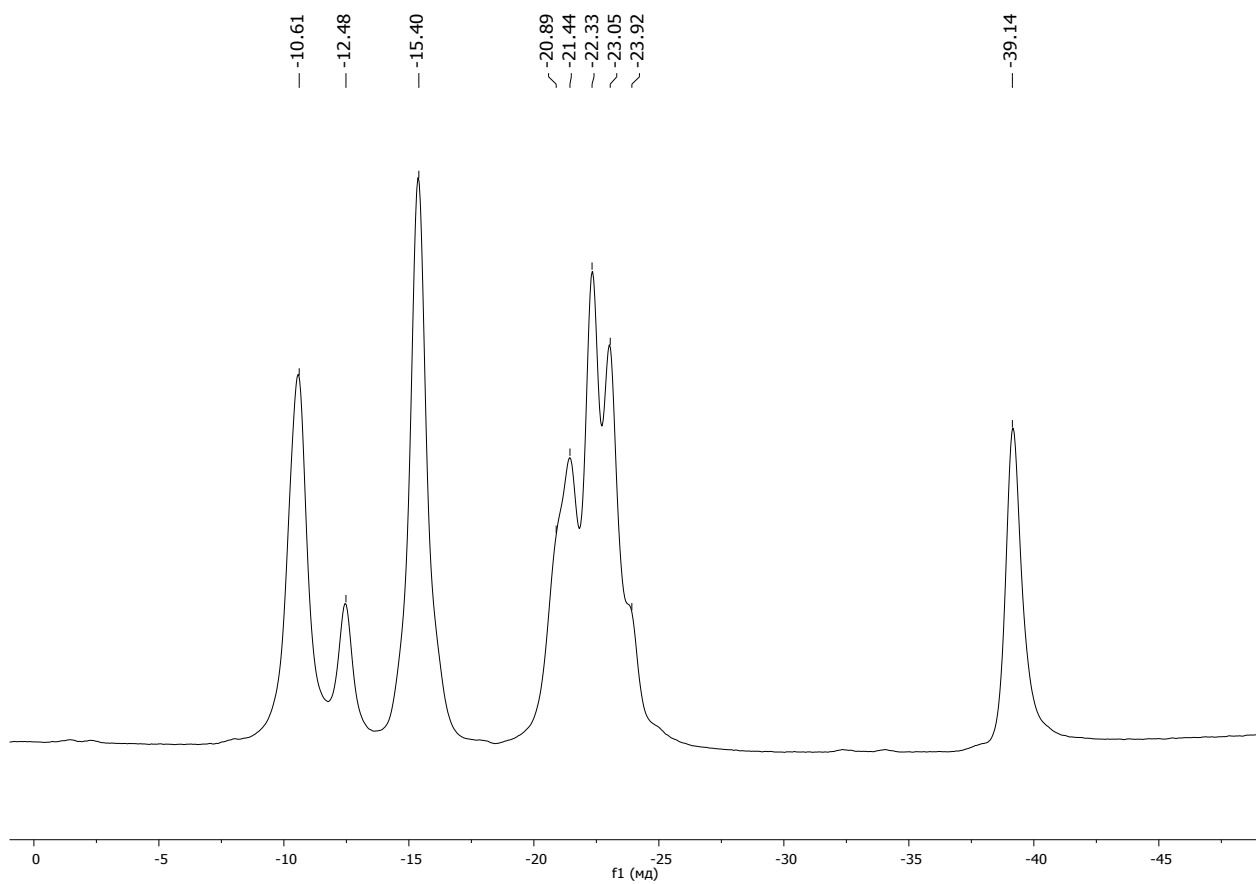

Fig. S23. <sup>11</sup>B{<sup>1</sup>H} NMR spectrum of compounds **4a** and **4b** (acetone-d<sub>6</sub>)

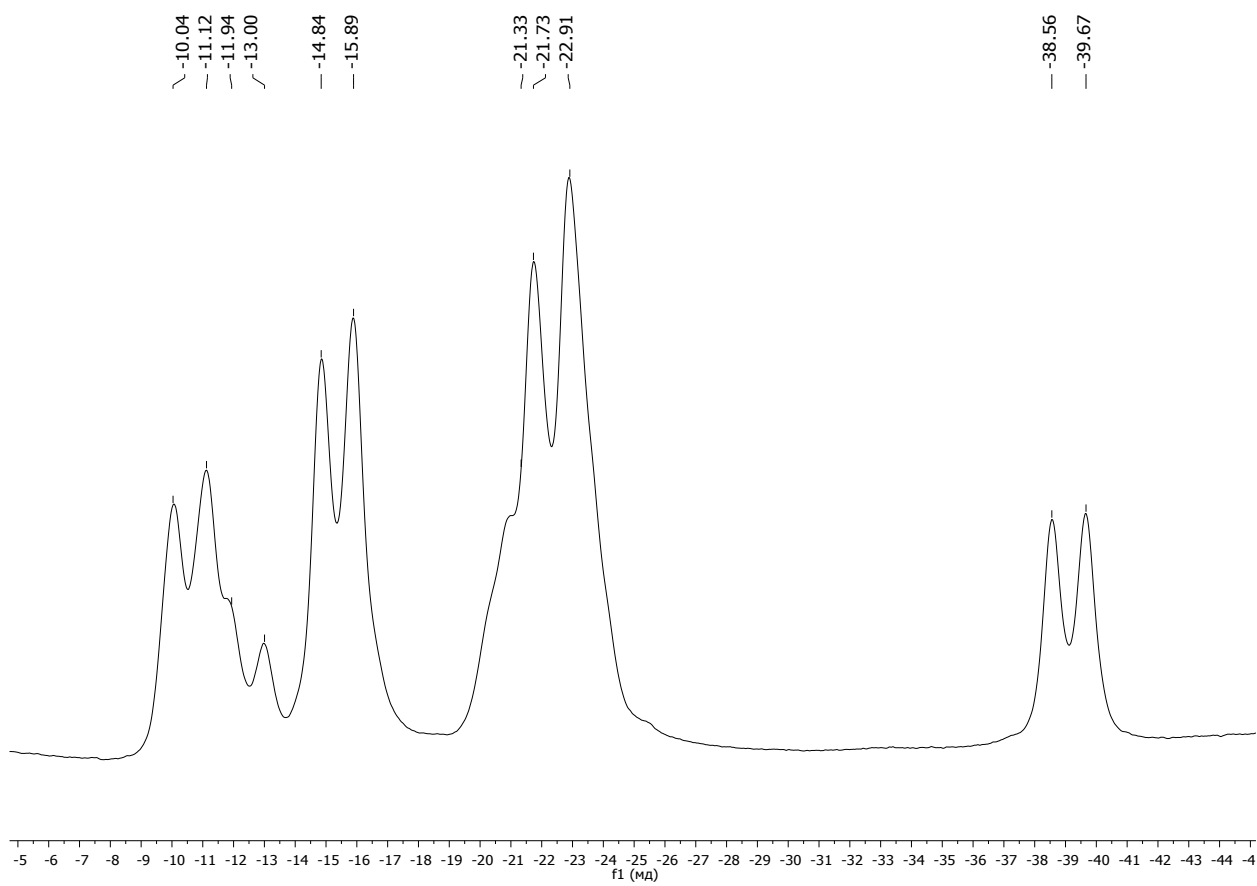

Fig. S24.  $^{11}\text{B}$  NMR spectrum of compounds **4a** and **4b** (acetone- $\text{d}_6$ )

Spectral data for [3-Ph<sub>3</sub>P-(8-MeOCH<sub>2</sub>CH<sub>2</sub>N=C(Et)NH)-3,1,2-NiC<sub>2</sub>B<sub>9</sub>H<sub>10</sub>] (6)

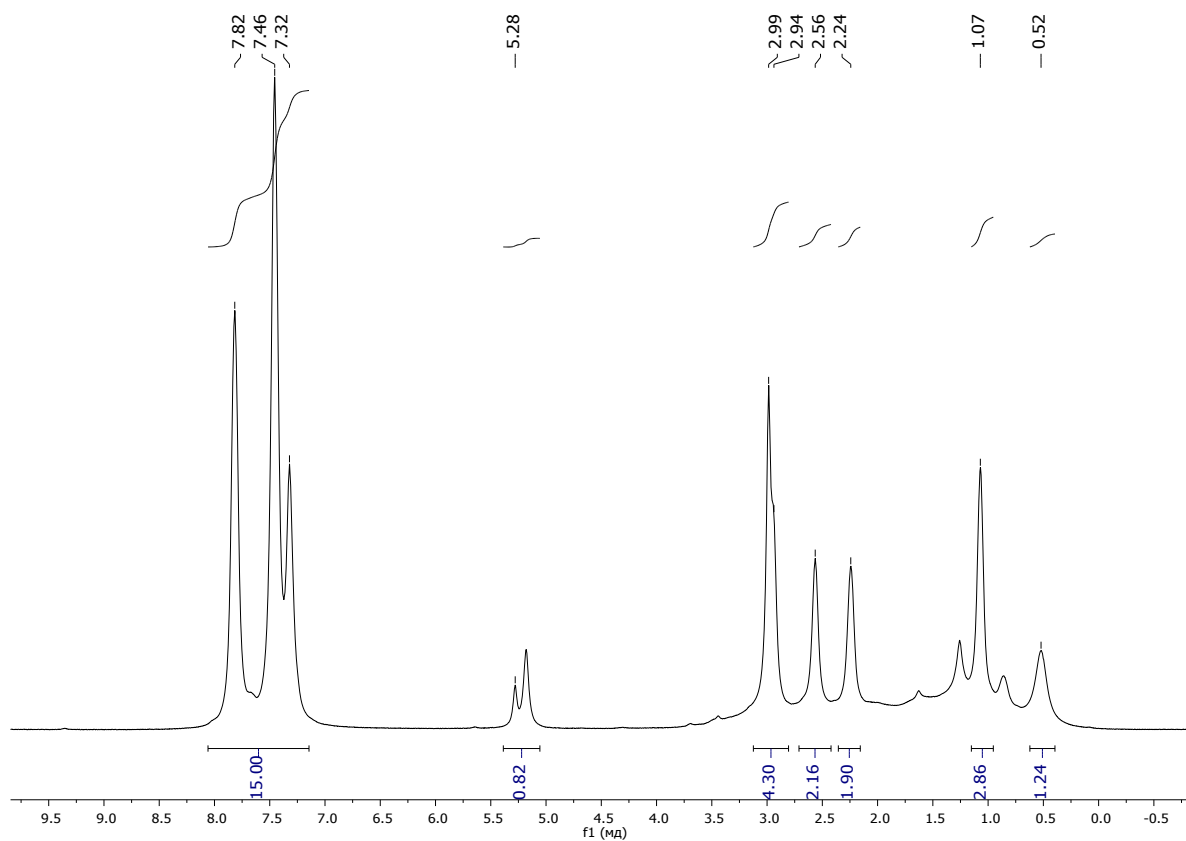

Fig. S25. <sup>1</sup>H NMR spectrum of compound 6 (CDCl<sub>3</sub>)

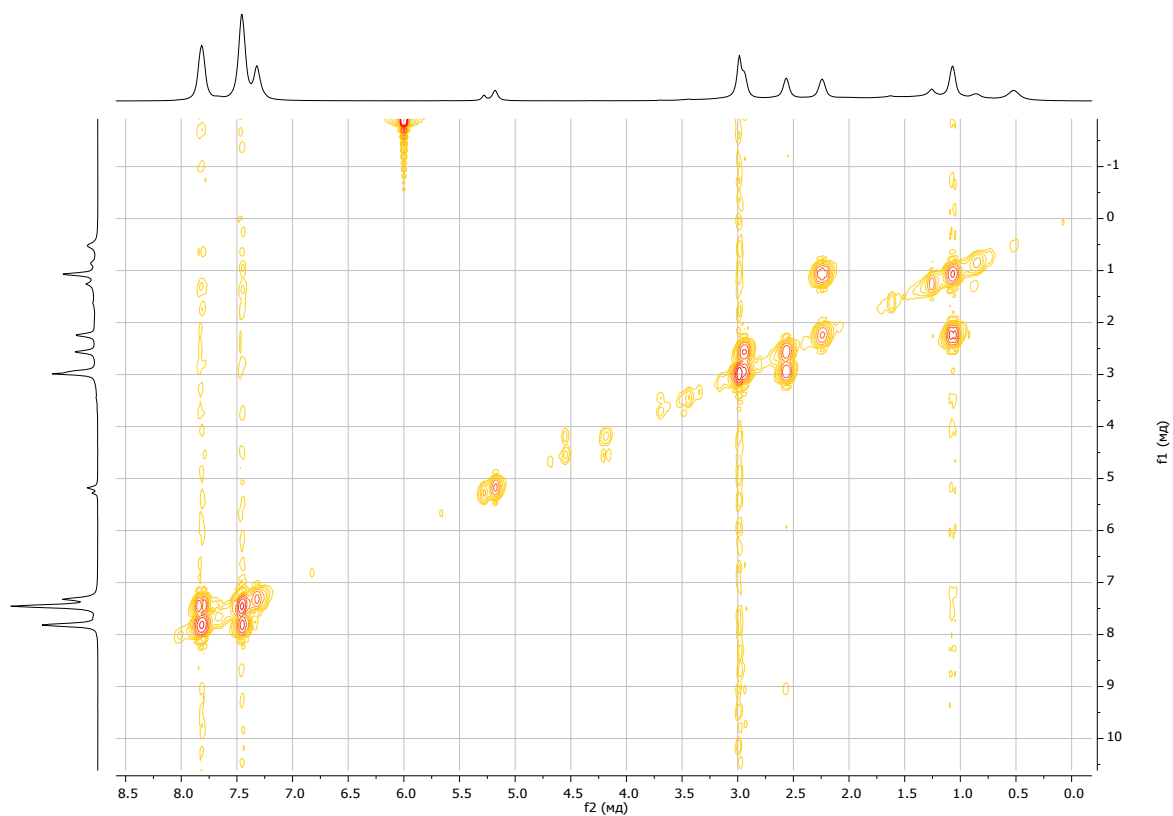

Fig. S26. (H,H)gCOSY NMR spectrum of compound 6 (CDCl<sub>3</sub>)



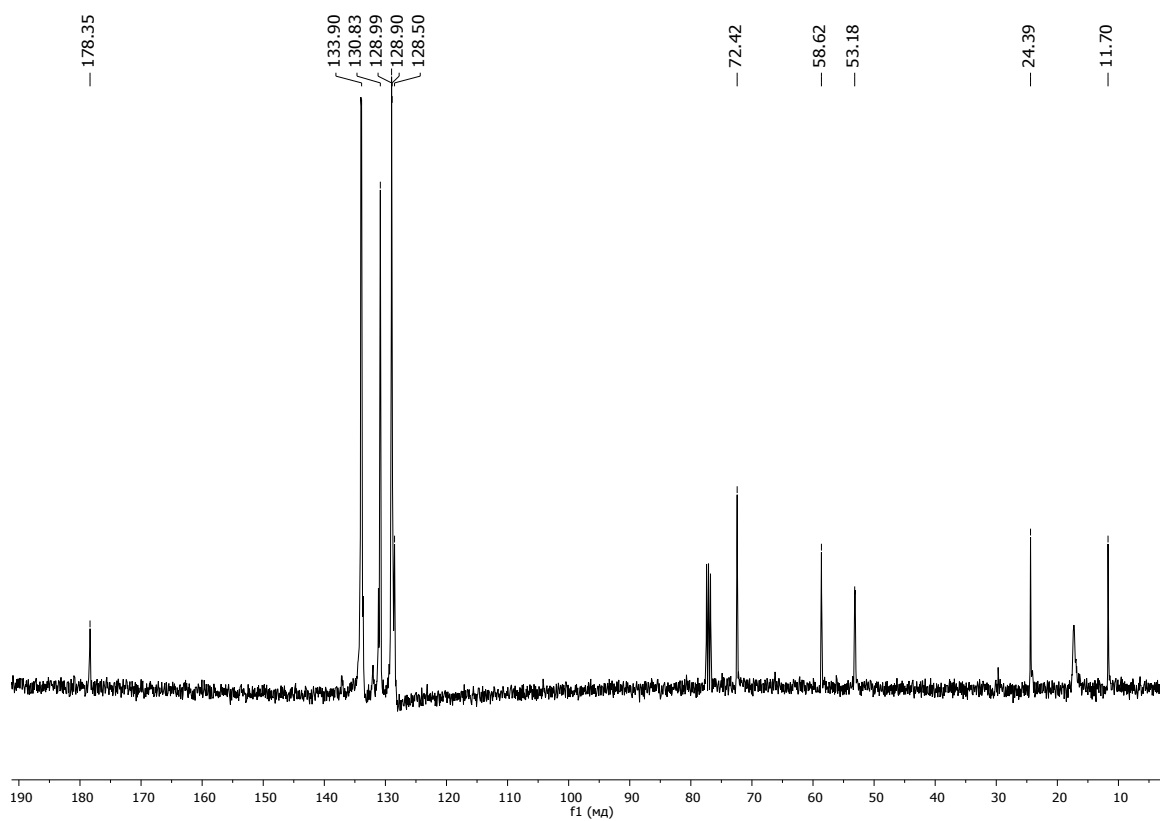

Fig. S27.  $^{13}\text{C}$  NMR spectrum of compound **6** ( $\text{CDCl}_3$ )

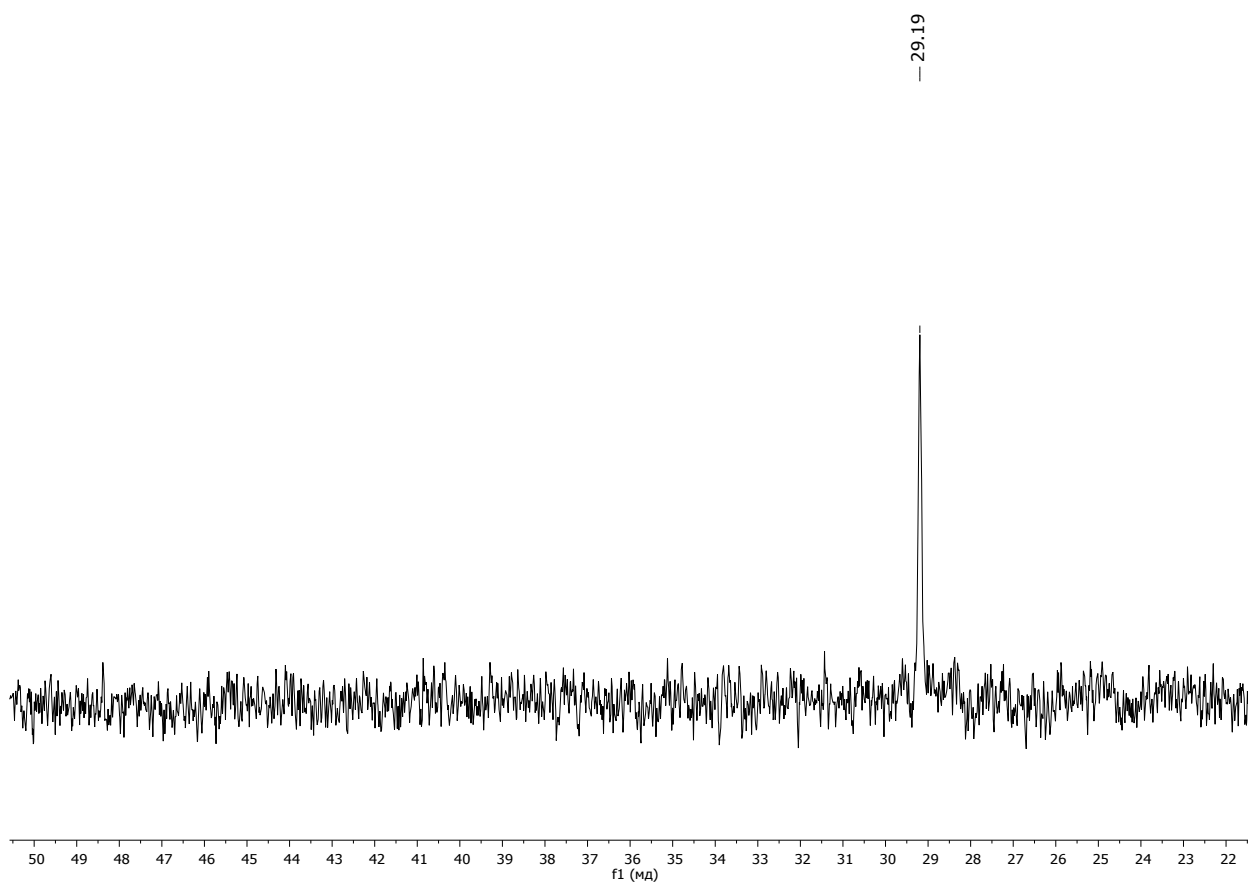

Fig. S28.  $^{31}\text{P}$  NMR spectrum of compound **6** ( $\text{CDCl}_3$ )

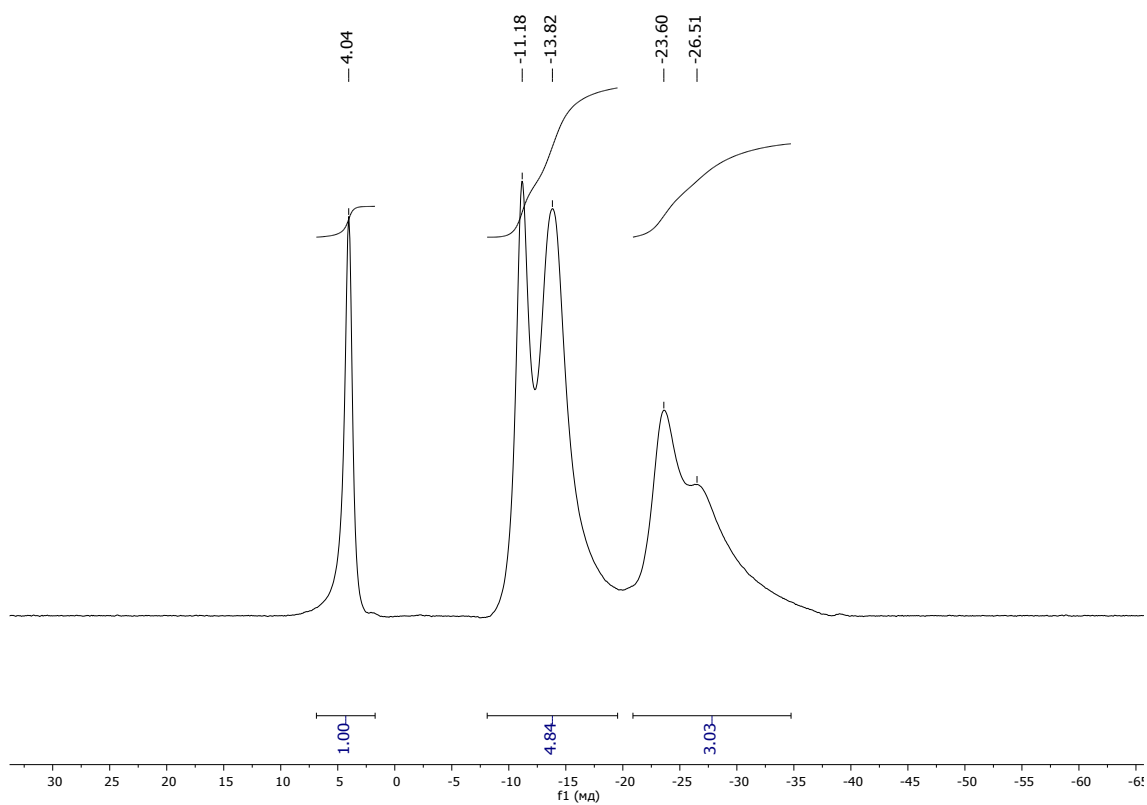

Fig. S29.  $^{11}\text{B}\{^1\text{H}\}$  NMR spectrum of compound **6** ( $\text{CDCl}_3$ )

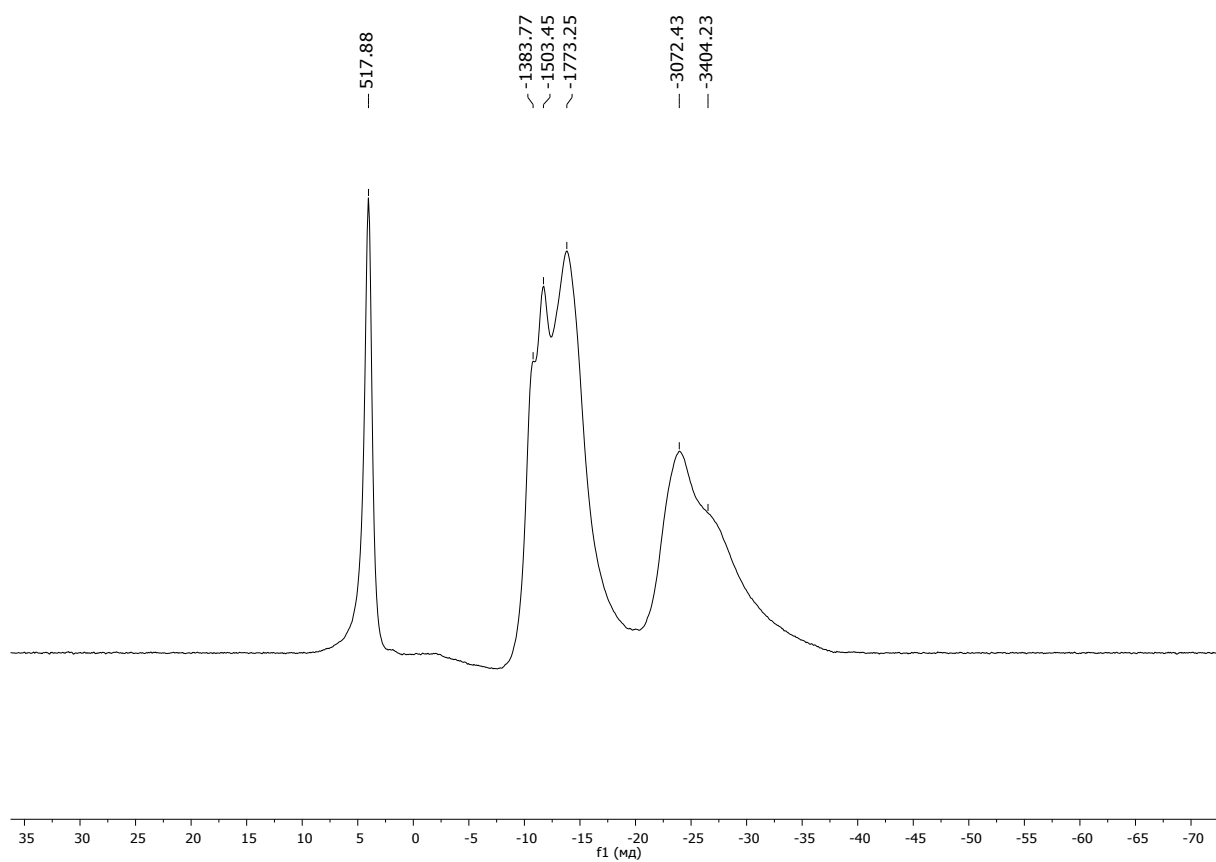

Fig. S30.  $^{11}\text{B}$  NMR spectrum of compound **6** ( $\text{CDCl}_3$ )

Spectral data for [3-Ph<sub>3</sub>P-(8-MeOCH<sub>2</sub>CH<sub>2</sub>N=C(Et)NH)-3,1,2-PdC<sub>2</sub>B<sub>9</sub>H<sub>10</sub>] (7)

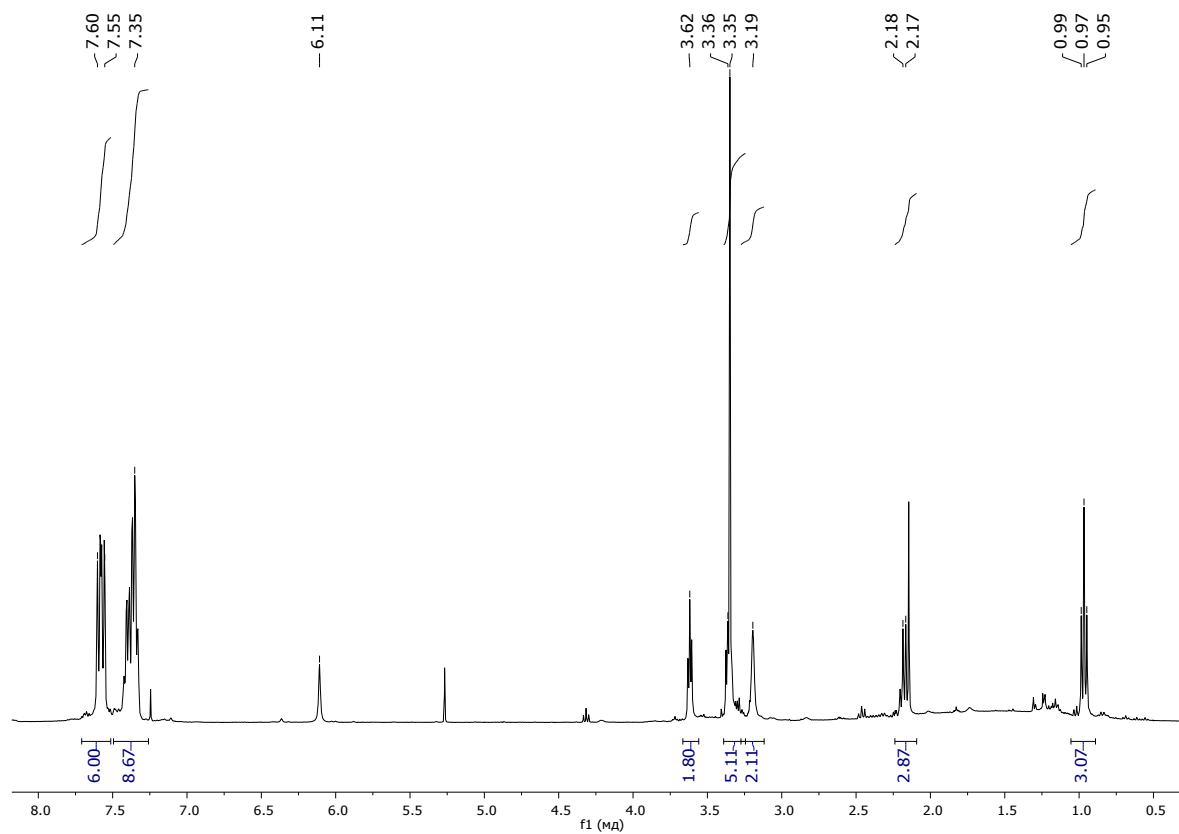

Fig. S31. <sup>1</sup>H NMR spectrum of compound 7 (CDCl<sub>3</sub>)

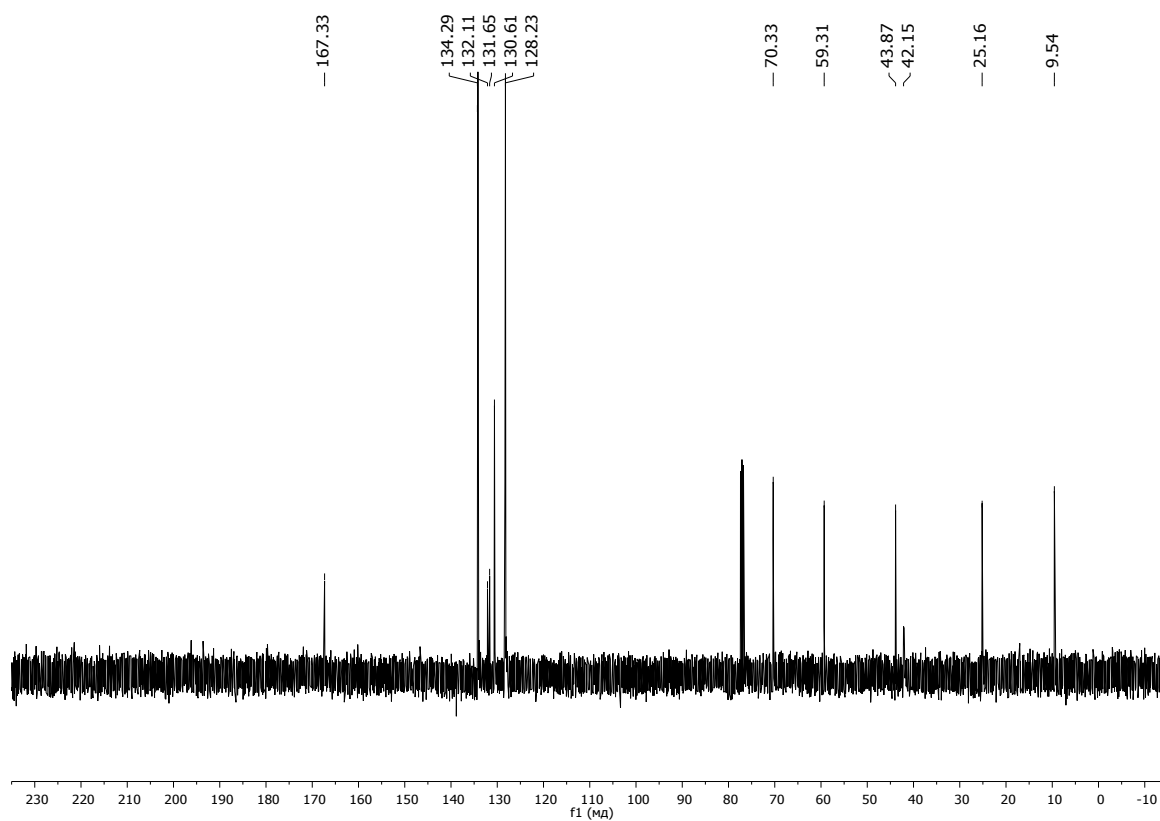

Fig. S32. <sup>13</sup>C NMR spectrum of compound 7 (CDCl<sub>3</sub>)

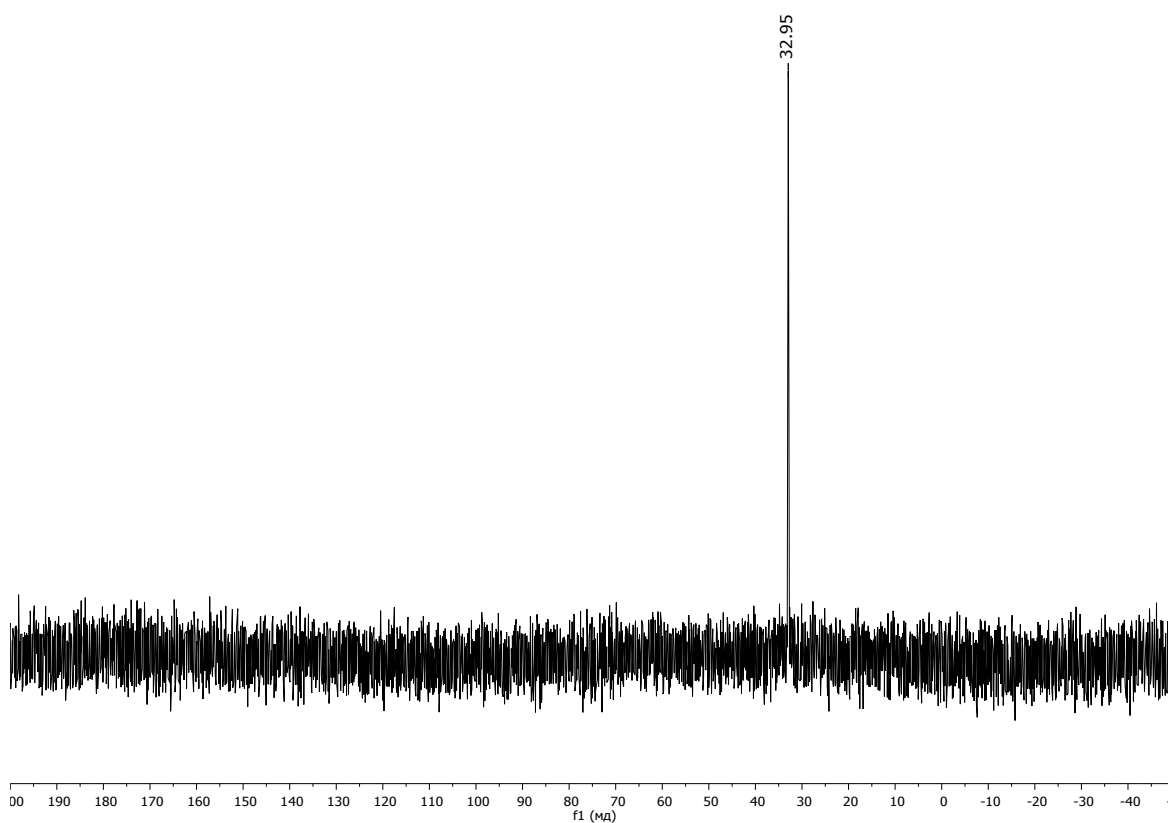

Fig.

Fig. S33.  $^{31}\text{P}$  NMR spectrum of compound **7** ( $\text{CDCl}_3$ )

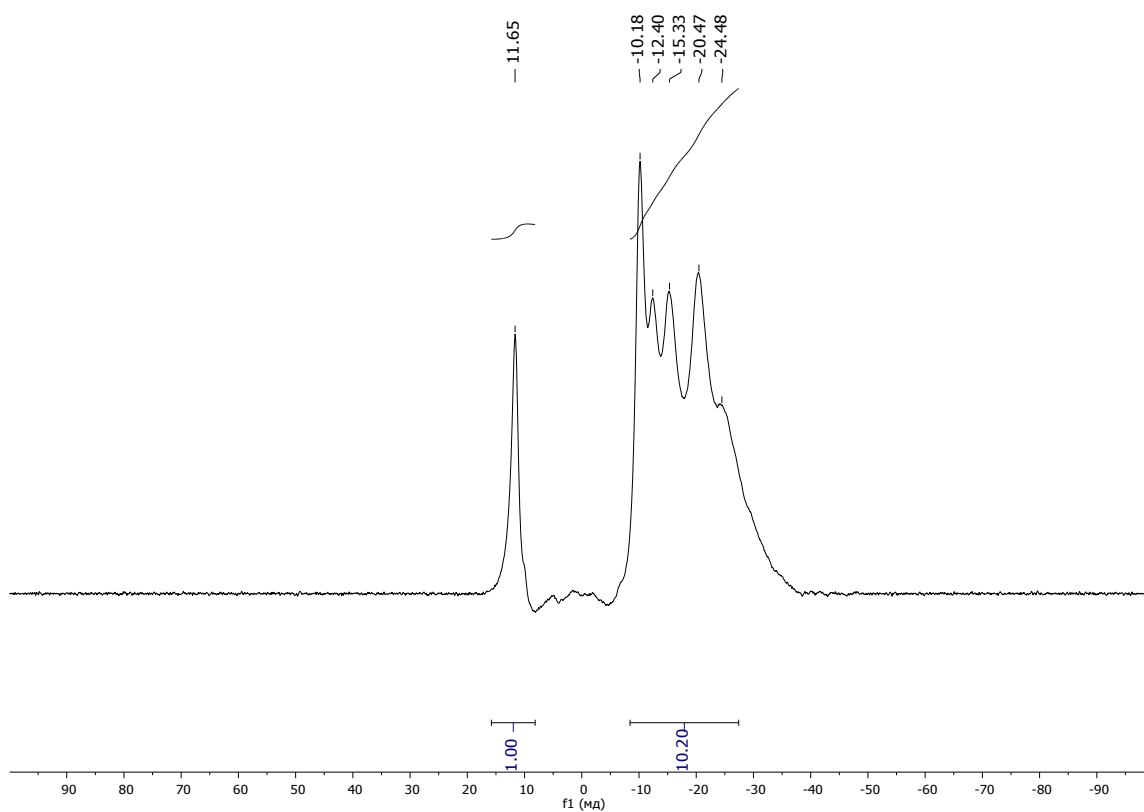

Fig. S34.  $^{11}\text{B}\{^1\text{H}\}$  NMR spectrum of compound **7** ( $\text{CDCl}_3$ )

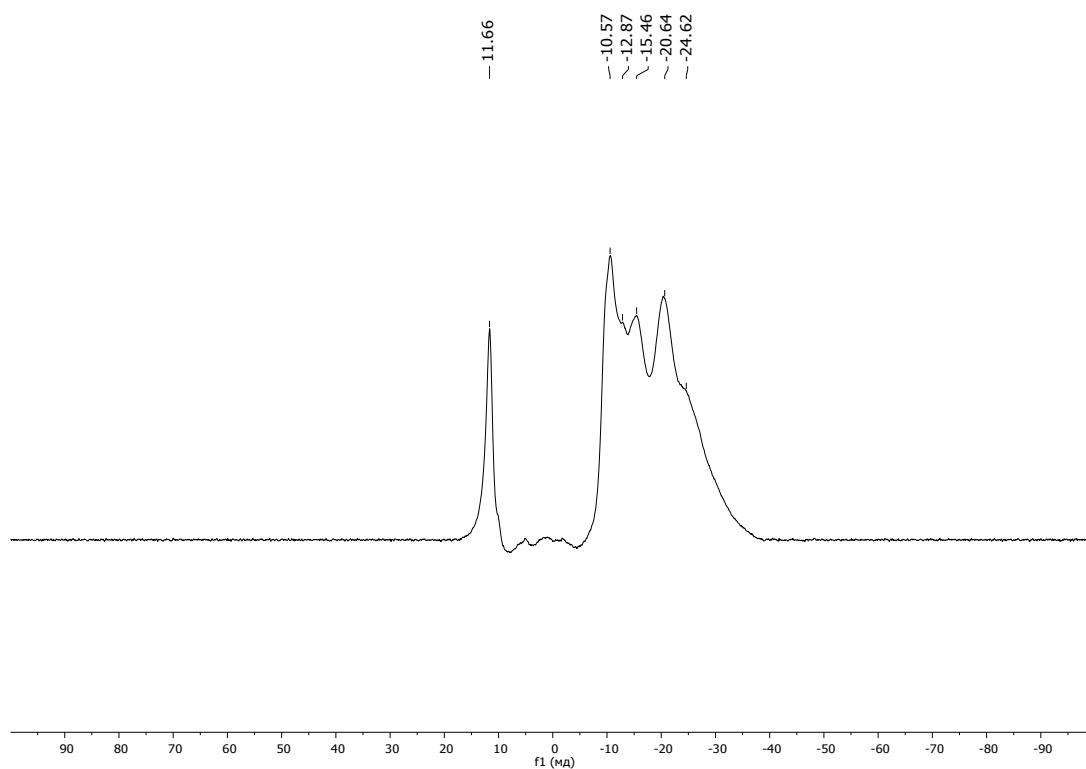

Fig. S35.  $^{11}\text{B}$  NMR spectrum of compound 7 ( $\text{CDCl}_3$ )

Spectral data for [3,3-(8-Me<sub>2</sub>NCH<sub>2</sub>CH<sub>2</sub>N=C(Et)NH)-3,1,2-NiC<sub>2</sub>B<sub>9</sub>H<sub>10</sub>] (**8**)

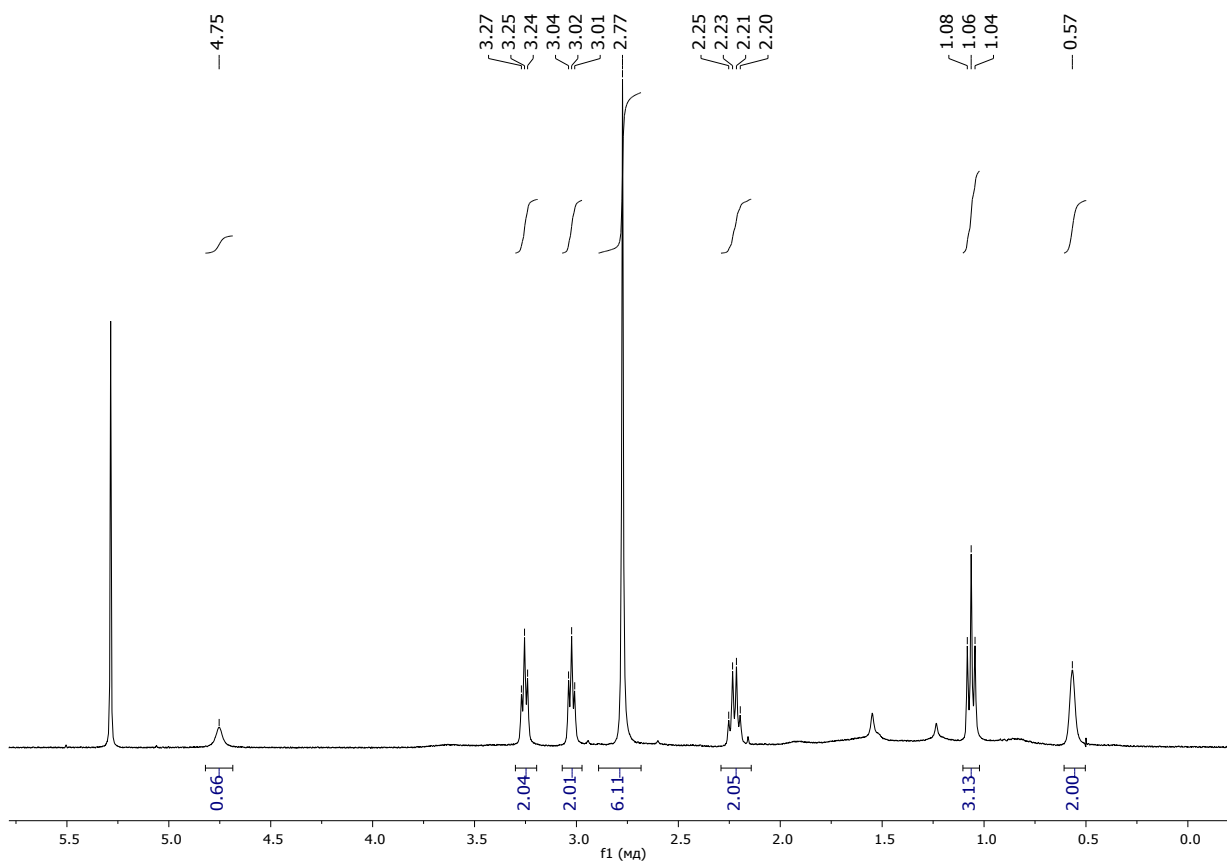

Fig. S36. <sup>1</sup>H NMR spectrum of compound **8** (CDCl<sub>3</sub>)

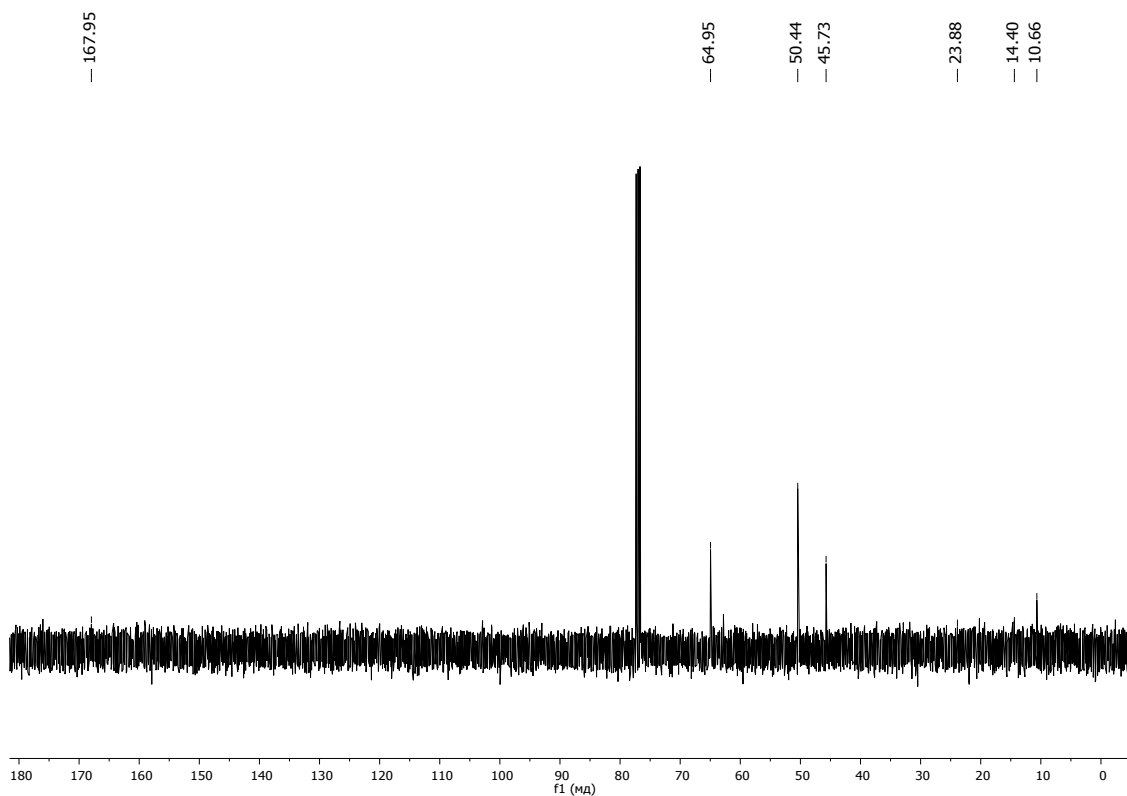

Fig. S37. <sup>13</sup>C NMR spectrum of compound **8** (CDCl<sub>3</sub>)

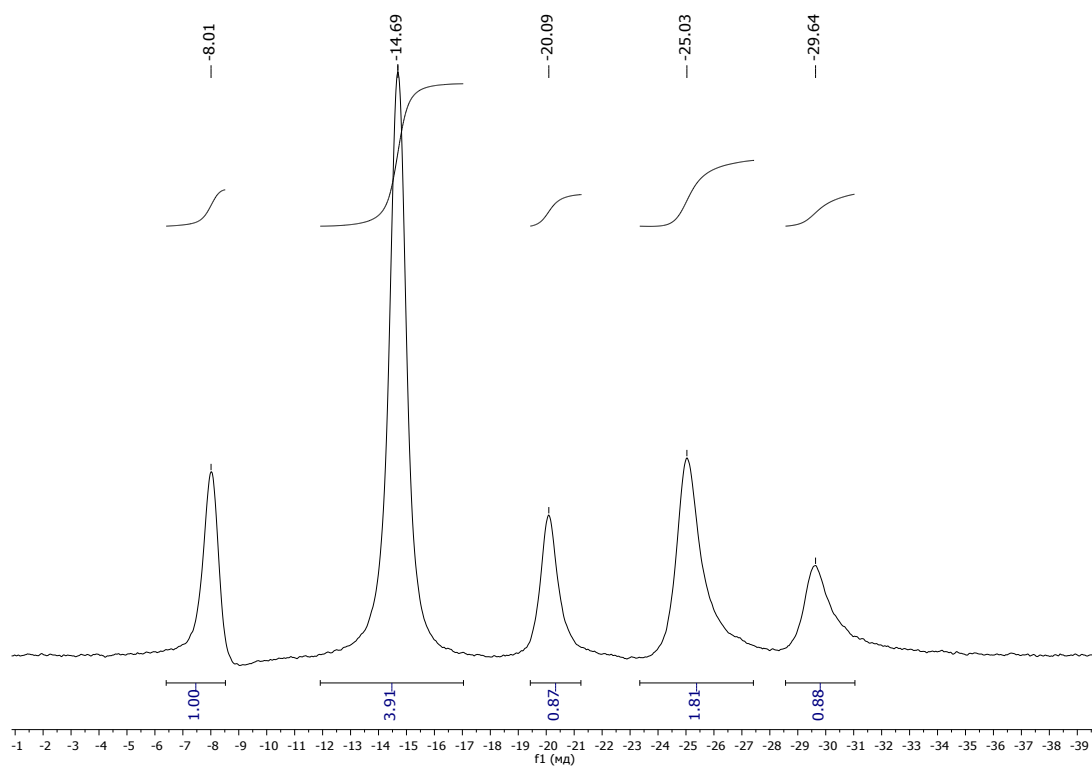

Fig. S38.  $^{11}\text{B}\{^1\text{H}\}$  NMR spectrum of compound **8** ( $\text{CDCl}_3$ )

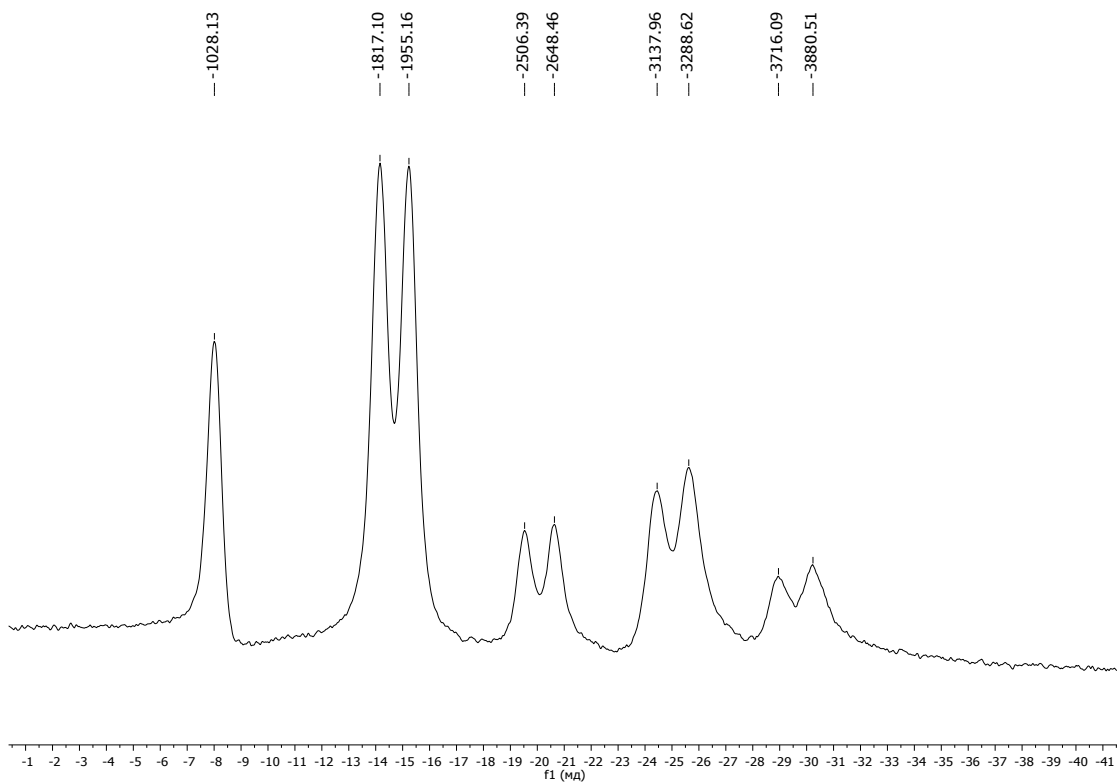

Fig. S39.  $^{11}\text{B}$  NMR spectrum of compound **8** ( $\text{CDCl}_3$ )

Spectral data for [3,3-(8-Me<sub>2</sub>NCH<sub>2</sub>CH<sub>2</sub>N=C(Et)NH)-3,1,2-PdC<sub>2</sub>B<sub>9</sub>H<sub>10</sub>] (9)

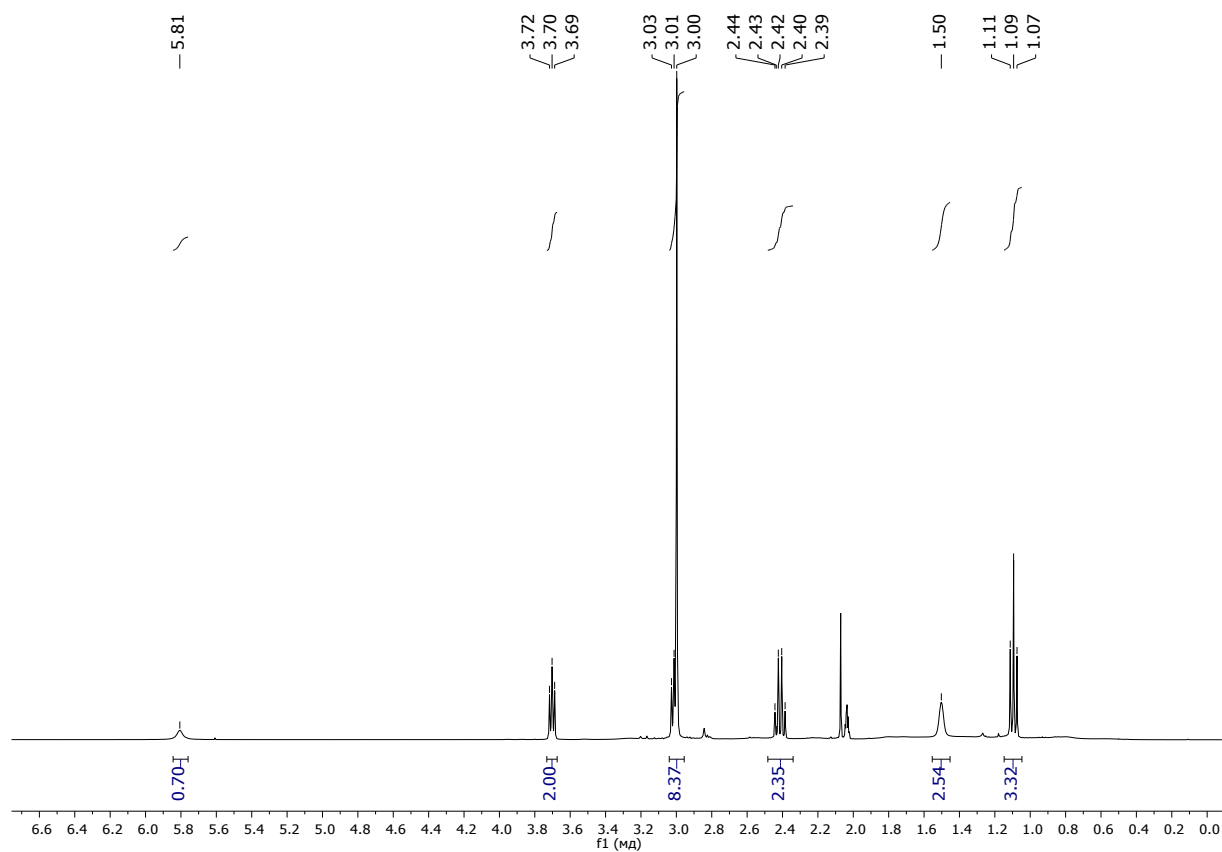

Fig. S40. <sup>1</sup>H NMR spectrum of compound **9** (acetone-d<sub>6</sub>)

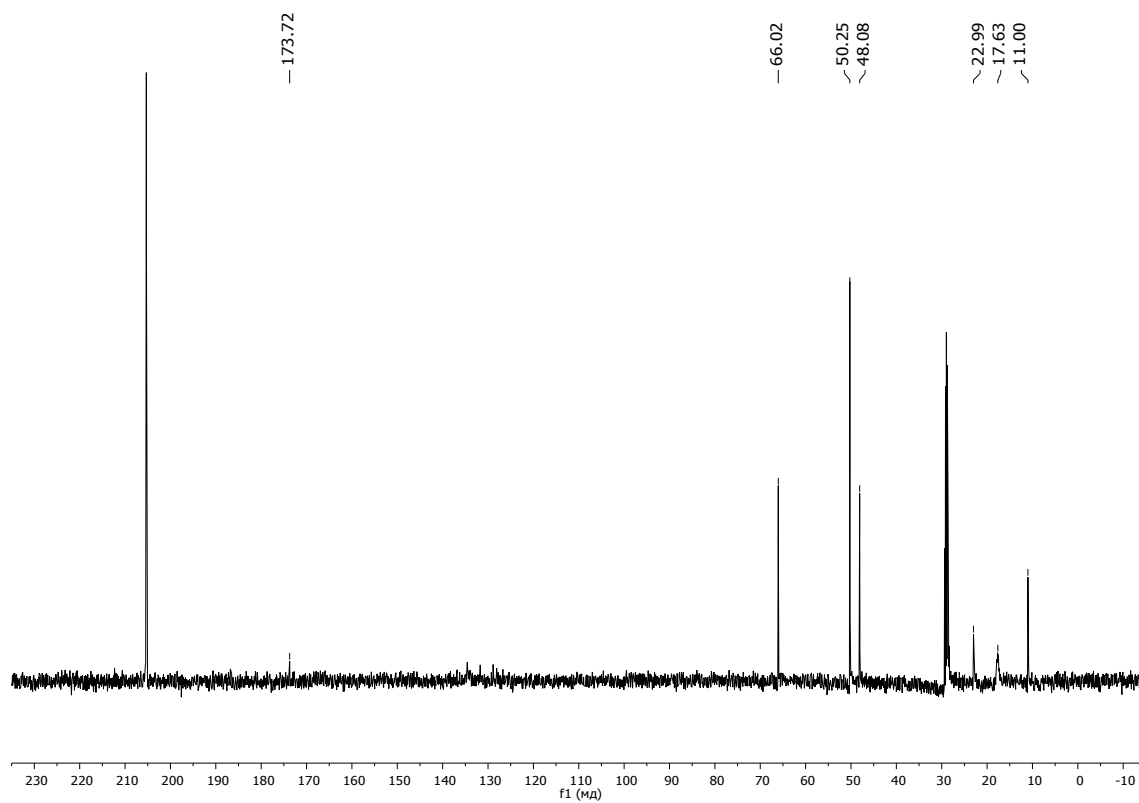

Fig. S41. <sup>13</sup>C NMR spectrum of compound **9** (acetone-d<sub>6</sub>)



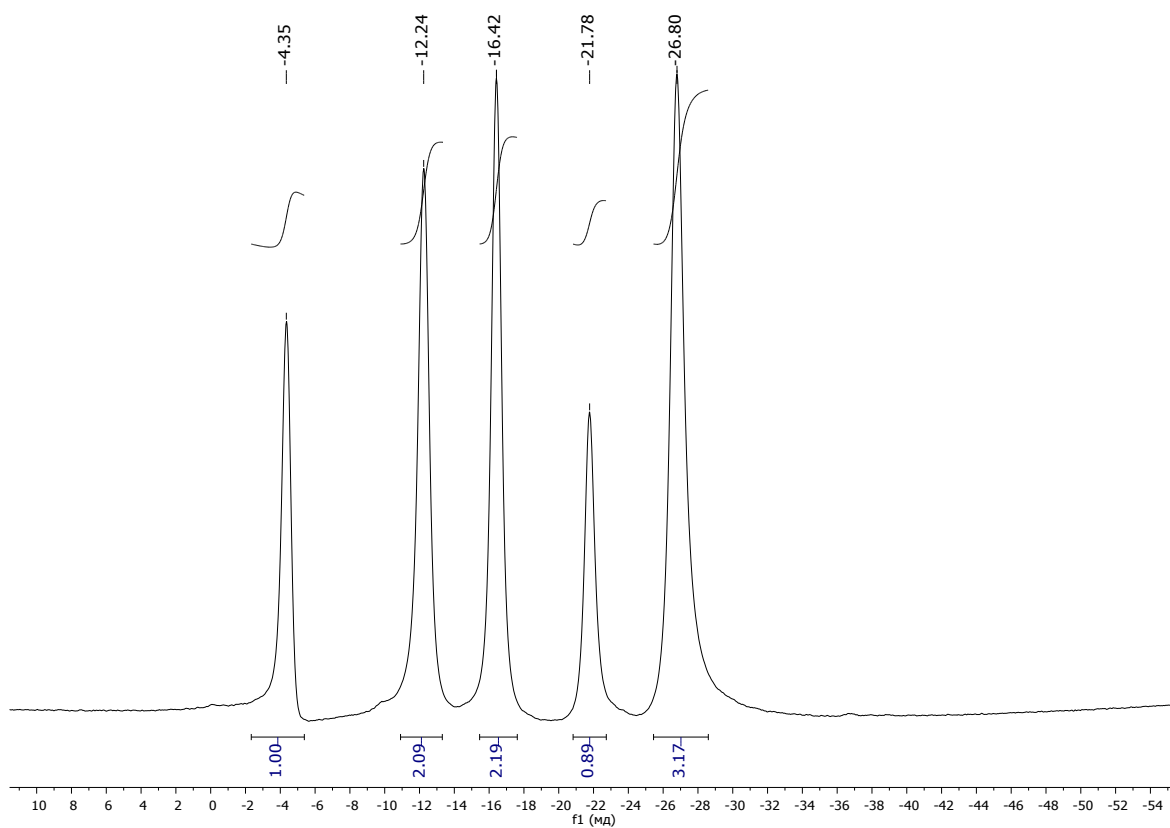

Fig. S42.  $^{11}\text{B}\{^1\text{H}\}$  NMR spectrum of compound **9** (acetone- $\text{d}_6$ )

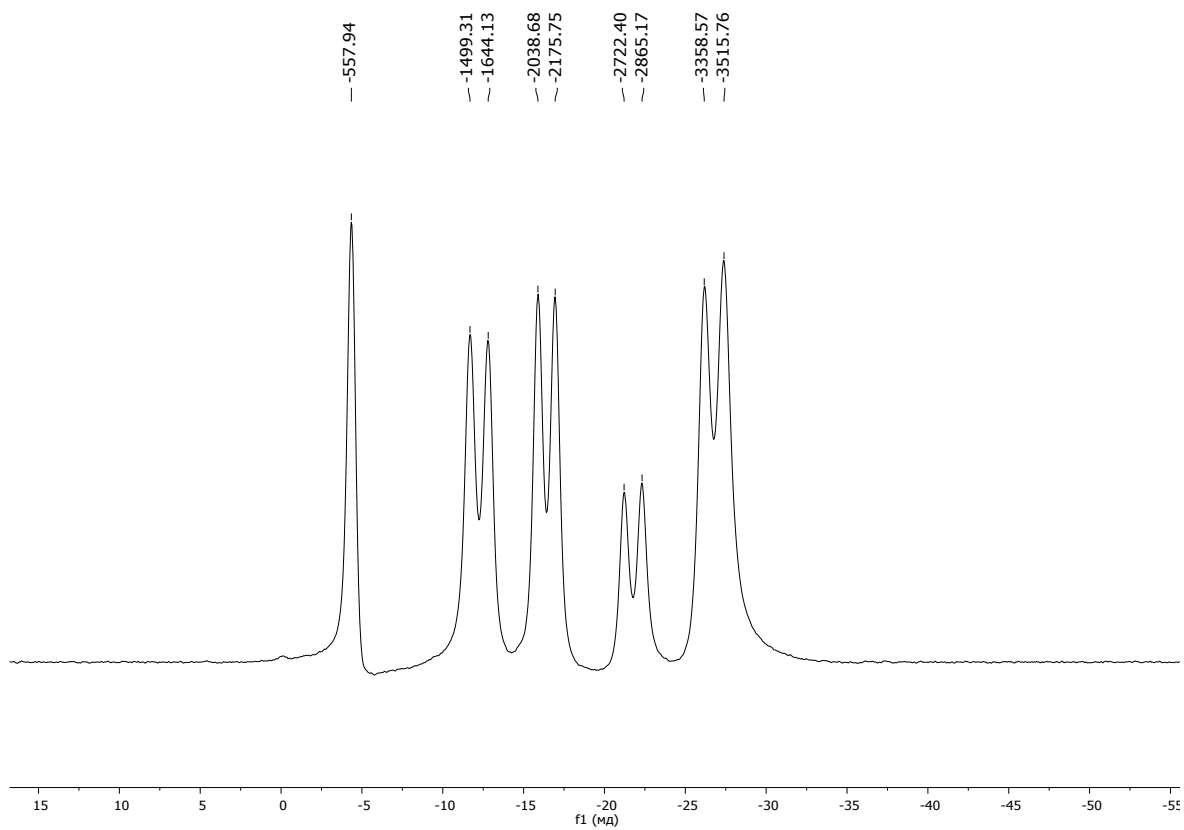

Fig. S43.  $^{11}\text{B}$  NMR spectrum of compound **9** (acetone- $\text{d}_6$ )

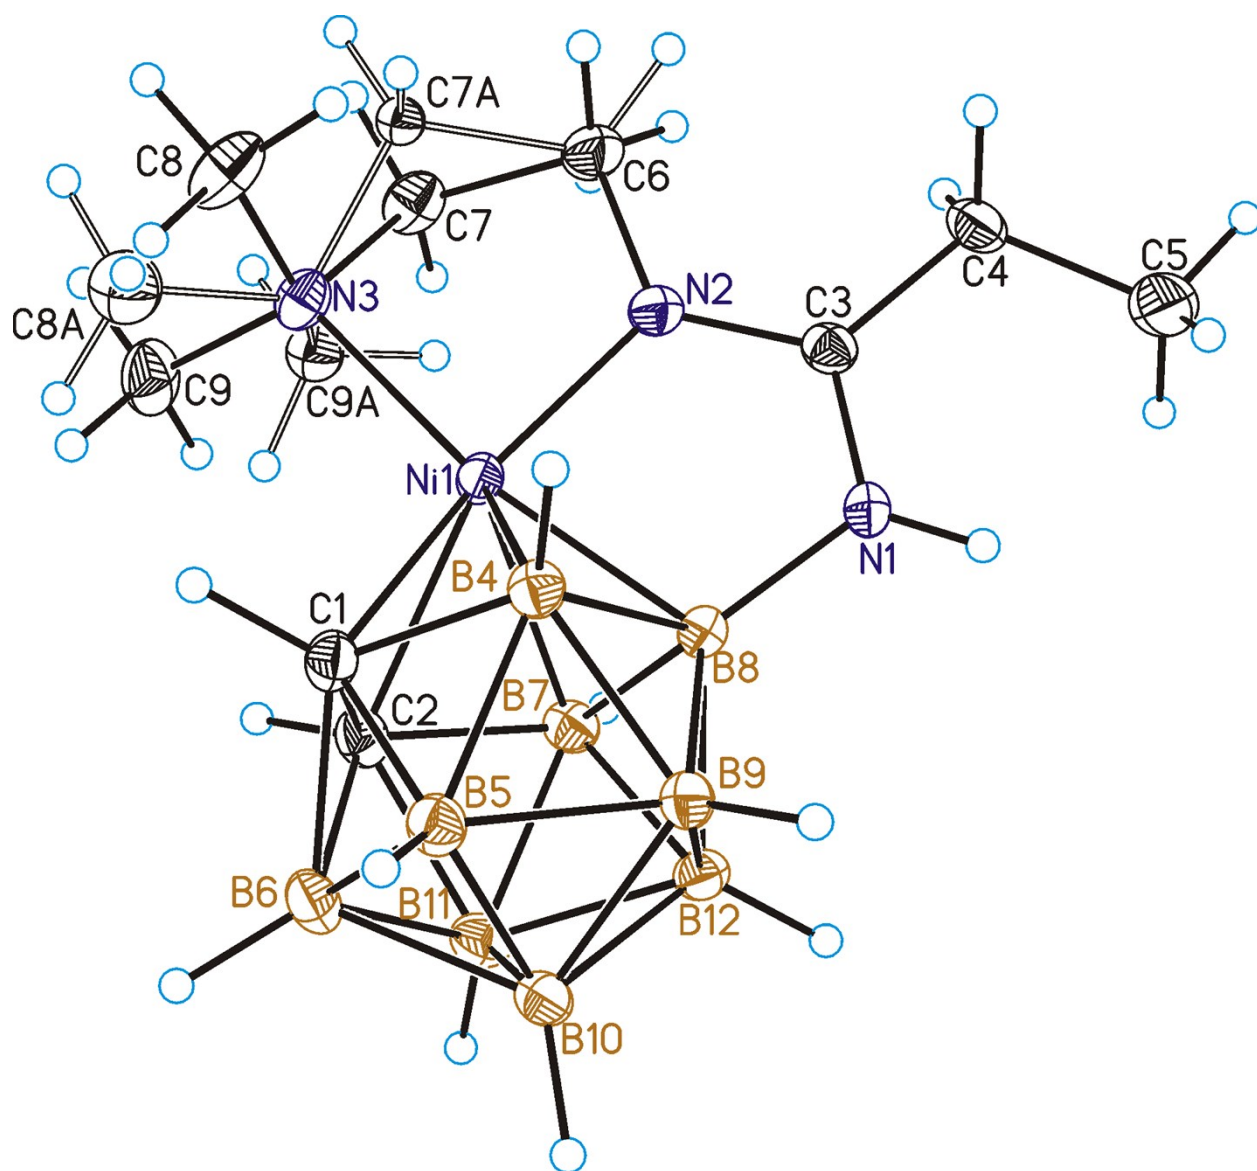

Figure S44. Disorder of complex **8**. Minor part is shown by open lines
